1 **Genomic islands targeting *dusA* in *Vibrio* species are distantly**  
2 **related to *Salmonella* Genomic Island 1 and mobilizable by IncC**  
3 **conjugative plasmids**

4

5 Romain Durand<sup>1,#a</sup>, Florence Deschênes<sup>1</sup> and Vincent Burrus<sup>1\*</sup>

6

7 <sup>1</sup> Département de biologie, Université de Sherbrooke, Sherbrooke, Québec,  
8 Canada

9 <sup>#a</sup>Current Address: Institut de Biologie Intégrative et des Systèmes, Université  
10 Laval, Québec, Canada

11

12 \* Corresponding author

13 E-mail: [vincent.burrus@usherbrooke.ca](mailto:vincent.burrus@usherbrooke.ca)

14

15 Short title: *dusA*-specific genomic islands mobilizable by IncC conjugative  
16 plasmids

## 17 **Abstract**

18 *Salmonella* Genomic Island 1 (SGI1) and its variants are significant contributors  
19 to the spread of antibiotic resistance among *Gammaproteobacteria*. All known  
20 SGI1 variants integrate at the 3' end of *trmE*, a gene coding for a tRNA  
21 modification enzyme. SGI1 variants are mobilized specifically by conjugative  
22 plasmids of the incompatibility groups A and C (IncA and IncC). Using a  
23 comparative genomics approach based on genes conserved among members of  
24 the SGI1 group, we identified diverse genomic islands (GIs) distantly related to  
25 SGI1 in several species of *Vibrio*, *Aeromonas*, *Salmonella*, *Pokkaliibacter*, and  
26 *Escherichia*. Unlike SGI1, these GIs target two alternative chromosomal loci, the  
27 5' end of *dusA* and the 3' end of *yicC*. Although these elements share many  
28 features with SGI1, they lack antibiotic resistance genes and carry alternative  
29 integration/excision modules. Functional characterization of MGIVchUSA3, a  
30 *dusA*-specific GI, revealed promoters that respond to AcaCD, the master  
31 activator of IncC plasmid transfer genes. Quantitative PCR and mating assays  
32 confirmed that MGIVchUSA3 excises from the chromosome and is mobilized by  
33 an IncC helper plasmid from *Vibrio cholerae* to *Escherichia coli*. MGIVchUSA3  
34 encodes the AcaC homolog SgaC that associates with AcaD to form a hybrid  
35 activator complex AcaD/SgaC essential for its excision and mobilization. We  
36 identified the *dusA*-specific recombination directionality factor RdfN required for  
37 the integrase-mediated excision of *dusA*-specific GIs from the chromosome. Like  
38 *xis* in SGI1, *rdfN* is under the control of an AcaCD-responsive promoter. Although  
39 the integration of MGIVchUSA3 disrupts *dusA*, the GI provides a new promoter

40 sequence and restores the reading frame of *dusA* for proper expression of the  
41 tRNA-dihydrouridine synthase A. Phylogenetic analysis of the conserved proteins  
42 encoded by SGI1-like elements targeting *dusA*, *yicC*, and *trmE* gives a fresh  
43 perspective on the possible origin of SGI1 and its variants.

44

#### 45 **Author summary**

46 We identified genomic islands distantly related to the *Salmonella* Genomic Island  
47 1 (SGI1), a key vector of antibiotic resistance genes in *Gammaproteobacteria*.  
48 SGI1 and its variants reside at the 3' end of *trmE*, share a large, highly  
49 conserved core of genes, and carry a complex integron that confers multidrug  
50 resistance phenotypes to their hosts. Unlike members of the SGI1 group, these  
51 novel genomic islands target the 5' end *dusA* or the 3' end of *yicC*, lack multidrug  
52 resistance genes, and seem much more diverse. We showed here that, like  
53 SGI1, these genomic islands are mobilized by conjugative plasmids of the IncC  
54 group. Based on comparative genomics and functional analyses, we propose a  
55 hypothetical model of the evolution of SGI1 and its siblings from the progenitor of  
56 IncA and IncC conjugative plasmids via an intermediate *dusA*-specific genomic  
57 island through gene losses and gain of alternative integration/excision modules.

## 58 **Introduction**

59 Integrative and mobilizable elements (IMEs) are discrete, mobile chromosomal  
60 regions, also known as genomic islands (GIs), that can excise from the  
61 chromosome and borrow the mating apparatus of helper conjugative elements to  
62 transfer to a new bacterial host [1,2]. IMEs are usually composed of two main  
63 functional modules. The site-specific recombination module contains genes and  
64 *cis*-acting sequences that mediate the integration of the IMEs into and their  
65 excision from the chromosome. The mobilization module includes the *cis*-acting  
66 origin of transfer (*oriT*) and usually encodes mobilization proteins required to  
67 initiate the conjugative transfer at *oriT* [1]. In its simplest form, the mobilization  
68 module only consists of an *oriT* locus mimicking the *oriT* of the helper element  
69 [3–5]. The excision of IMEs is elicited by conjugative plasmids or integrative and  
70 conjugative elements (ICEs). These helper elements also encode the type IV  
71 secretion system (T4SS) that translocates the IME DNA into the recipient cell [1].

72 Several distinct families of IMEs have been described to date. Most encode  
73 beneficial traits for their host, such as resistance to antibiotics and heavy metals  
74 or bacteriocin synthesis [1,6,7]. *Salmonella* Genomic Island 1 (SGI1) is arguably  
75 one of the most atypical and most studied IMEs. Though first described 20 years  
76 ago, SGI1 and its siblings have only recently gained a lot of attention due to their  
77 prevalence and prominent role in the spread of multidrug resistance [8]. The  
78 canonical 43-kb SGI1 resides at the 3' end of *trmE* (also known as *mnmE* or  
79 *thdF*) in *Salmonella enterica* serovar Typhimurium DT104 [9]. *trmE* encodes the  
80 5-carboxymethylaminomethyluridine-tRNA synthase GTPase subunit. SGI1

81 variants have been reported in a wide array of *Gammaproteobacteria*, including  
82 *Proteus mirabilis* (PGI1), *Acinetobacter baumannii* (AGI1), *Morganella*,  
83 *Providencia*, *Enterobacter*, and *Escherichia coli*, but also in *Vibrio cholerae* and  
84 *Klebsiella pneumoniae* [10–12]. Most variants carry a class I integron structurally  
85 similar to the In104 integron of SGI1. In104 confers resistance to ampicillin,  
86 chloramphenicol, streptomycin/spectinomycin, sulfamethoxazole, and  
87 tetracycline [13,14]. SGI1 and its variants are an epidemiological threat  
88 exacerbated by their specific mobilization by conjugative plasmids of the  
89 incompatibility groups A (IncA) and C (IncC) [15,16]. IncC plasmids contribute to  
90 the global circulation of multidrug resistance genes, including NDM metallo- $\beta$ -  
91 lactamase and carbapenemase genes, among a broad range of  
92 *Gammaproteobacteria* [17,18]. The transcriptional activator AcaCD encoded by  
93 IncC plasmids triggers the excision and mobilization of SGI1 [19,20].

94 SGI1 and its variants share a conserved set of genes within which insertion  
95 sequences and the class 1 integron are inserted at diverse positions [21–24].  
96 The SGI1 backbone is 27.4 kb and contains 28 open reading frames [9].  
97 Members of the SGI1-HKL group seem to have a smaller backbone [23]. Thus  
98 far, the function of a few conserved genes has been characterized. Together with  
99 the *cis*-acting recombination site *attP*, the genes *int* and *xis* form the  
100 recombination module of SGI1 [15]. *int* encodes a site-specific tyrosine  
101 recombinase (integrase) that targets the 3' end of *trmE*. The recombination  
102 directionality factor (RDF or excisionase) encoded by *xis* enhances the excision  
103 reaction catalyzed by Int. The mobilization module includes the mobilization

104 genes *mpsAB* and the *oriT* located upstream of *mpsA* [25]. *mpsA* encodes a  
105 tyrosine recombinase that acts as an atypical relaxase. Unlike most  
106 characterized IMEs, SGI1 carries a replicon composed of an iteron-based origin  
107 of replication (*oriV*) and replication initiator gene *rep* [26,27]. The transcriptional  
108 activator complex SgaCD, expressed by SGI1 in response to a coresident IncC  
109 plasmid, controls *rep* expression [27,28]. SGI1 also enhances its stability with the  
110 help of the *sgiAT* addiction module [29]. At the same time, its replication  
111 destabilizes the helper plasmid [26,28,30]. Finally, SGI1 encodes three mating  
112 pore subunits, TraN<sub>S</sub>, TraH<sub>S</sub>, and TraG<sub>S</sub>, that actively replace their counterparts  
113 in the T4SS encoded by the IncC plasmid [31]. The substitution of TraG allows  
114 SGI1 to bypass the IncC-encoded entry exclusion mechanism and transfer  
115 between cells carrying conjugative plasmids belonging to the same entry  
116 exclusion group [32].

117 Given the atypical functional features conserved in SGI1 variants integrated at  
118 *trmE*, we undertook a search for distantly related elements by favoring the  
119 retention of conserved functions rather than maximize sequence similarity with  
120 SGI1. Using MpsA, TraG<sub>S</sub>, SgaC, and TraN<sub>S</sub> as baits, we searched databases  
121 for distant SGI1-like IMEs in bacterial genomes. We report the existence of  
122 distantly related IMEs integrated at the 5' end of *dusA* in several species of  
123 *Vibrionaceae* and the 3' end of *yjcC* in several species of *Gammaproteobacteria*.  
124 We have examined the interactions between an IncC plasmid and MGIVchUSA3,  
125 a *dusA*-specific representative IME *dusA* from an environmental *V. cholerae*  
126 strain. The genetic determinants required for the excision of MGIVchUSA3 and

127 its mobilization by IncC plasmids were characterized. Finally, we took a fresh  
128 look at the emergence and evolution of SGI1 and its siblings by conducting  
129 phylogenetic analyses and proposed a hypothetical evolutionary pathway of  
130 IMEs resembling SGI1.

## 131 **Results**

### 132 **Novel genomic islands resembling SGI1 are inserted in *dusA* and *yicC* in** 133 **various *Gammaproteobacteria***

134 To find novel SGI1-like elements, we searched the Refseq database using blastp  
135 and the primary sequences of MpsA, TraG<sub>S</sub>, SgaC, and TraN<sub>S</sub>. Considering the  
136 substitution of integration modules can change the integration site [33–36], the  
137 integrase Int<sub>trmE</sub> was excluded from the analysis. We identified 24 distinct GIs  
138 encoding homologs of the four bait proteins in 36 different bacterial strains (Fig 1  
139 and S1 Table). 21 of these GIs are integrated into the 5' end of *dusA* in diverse  
140 *Vibrio* species from various origins. The remaining three are located at the 3' end  
141 of *yicC* in *E. coli*, *Aeromonas veronii*, *P. mirabilis*, *S. enterica* serovar Kentucky,  
142 and *Pokkaliibacter plantistimulans*. The size of the GIs varies from 22.8 kb to  
143 37.1 kb. The conserved genes *mpsA* (together with *mpsB*), *traG*, *traN*, and *sgaC*  
144 remain in a syntenic order, though sporadically separated by variable DNA (Fig  
145 1).

146 **Figure 1. Schematic representations of SGI1-related genomic islands.** The  
147 position and orientation of open reading frames (ORFs) are indicated by arrowed  
148 boxes. Colors depict the function deduced from functional analyses and BLAST  
149 comparisons. AcaCD binding sites are represented by green angled arrows.  
150 Each island is flanked by the *attL* and *attR* (vertical grey lines) attachment sites  
151 when integrated into the 3' end of *trmE* (light blue), the 5' end of *dusA* (light  
152 green), or the 3' end of *yicC* (pink). Regions that are conserved between two  
153 adjacent GIs are depicted in light grey.



154 Consistent with the change of integration site, the respective *int* genes of SGI1  
155 and the *dusA*- and *yicC*-specific GIs are unrelated. Furthermore, these novel GIs  
156 lack *xis* downstream of *int*. Instead, *yicC*-specific GIs carry two small open  
157 reading frames (ORF) upstream of the *attR* site. The putative translation product  
158 of the second one shares 35% identity over 65% coverage with the excisionase  
159 RdfM of MGIVflInd1 [37]. Although *dusA*-specific GIs lack *xis* and *rdfM*, all carry  
160 an ORF predicted to encode a 76-aminoacyl residue protein containing the  
161 pyocin activator protein PrtN domain (Pfam PF11112). Based on its size,  
162 position, predicted DNA-binding function, conservation, and evidence presented  
163 below, we named this ORF *rdfN*.

164 None of the reported GIs carries the same replication module (*S004-rep-oriV*) as  
165 canonical SGI1. Instead, five *dusA*-specific GIs encode a putative replication  
166 initiator protein with the IncFII\_repA domain (Pfam PF02387) (Fig 1). The three  
167 *yicC*-specific GIs encode a homolog of TrfA (Pfam PF07042), the replication  
168 initiator protein of broad-host-range IncP plasmids [38]. No replicative functions  
169 could be ascribed with confidence to any gene carried by the other *dusA*-specific  
170 GIs.

171 Although all these GIs seem to lack antibiotic resistance genes, several encode  
172 putative functions altering host processes and virulence, including the transport  
173 of ions and small molecules, chemotaxis, c-di-GMP signalling, and fimbriae. Nine  
174 GIs also encode toxin-antitoxin systems, such as *sgiAT* and *higAB*, which likely  
175 enhance their stability (Fig 1).

176 Finally, two accreted and distinct GIs compose *GIVchBan1*: an SGI1-like GI and  
177 a second unrelated GI coding for two predicted integrases sharing 44% and 27%  
178 identity with  $\text{Int}_{dusA}$  that targets *dusA*. This second GI encodes a putative type I  
179 restriction-modification system, a MobA-like relaxase ( $\text{MOB}_{P1}$ ), the mobilization  
180 auxiliary factor MobC, and an RdfN homolog (Fig 1).

### 181 **Three types of *dusA*-integrated SGI1-related elements**

182 Blastn and blastp analyses using SGI1 $\Delta$ In104 and *GIVchUSA2* as references  
183 confirmed that the identified *dusA*-specific GIs share extensive similarities (Fig  
184 2). Besides the conserved genes encoding MpsA, TraG, SgaC, and TraN, all  
185 carry the auxiliary mobilization factor gene *mpsB* and the *oriT* sequence (Fig 2A).  
186 Secondary structure prediction of the aligned *oriT* sequences located upstream  
187 of *mpsA* using RNAalifold revealed that despite the sequence divergence, the  
188 structure of *oriT* with three stem-loops was strictly conserved (S1B Fig). In  
189 contrast, *sgaD* is not strictly conserved and highly divergent from *sgaD* of SGI1  
190 when present. Comparison using *GIVchUSA2* as the reference revealed that  
191 *dusA*-specific GIs are distant from SGI1 and cluster into three distinct types as  
192 confirmed by the phylogenetic analysis of concatenated MpsA-TraG-SgaC-TraN  
193 and  $\text{Int}_{dusA}$  proteins (Fig 2B, 3A and 3C, and S2 Fig). Type 1 *dusA*-specific GIs  
194 such as *MGIVchUSA3* are mainly found in *V. cholerae* and lack both *traH* and  
195 *sgaD*. Type 2 GIs such as *GIVchUSA2* lack *sgaD* but carry *traH* and are closely  
196 related to *yicC*-specific GIs. Finally, type 3 GIs such as *GIVchUSA5* are the most  
197 distant from the two other types and SGI1 (Fig 3A). Type 3 GIs carry both *traH*  
198 and *sgaD* and reside in diverse *Vibrio* species.

199 **Figure 2. Comparative sequence analysis of SGI<sub>dusA</sub> islands.** Blastn and  
200 Blastp atlases were constructed using the Blast Ring Image Generator (BRIG)  
201 0.95 [39], using either SGI1ΔIn104 (A) or GIV<sub>chUSA2</sub> (B) as the reference.  
202 Coding sequences appear on the outermost circle in blue for the positive strand  
203 and red for the negative strand, with the origin of transfer depicted as a grey arc.  
204 All other sequences are represented only according to their homology with the  
205 reference, with full opacity corresponding to 100% identity and gaps indicating  
206 identity below 60%. The order of the GIs in the atlases is indicated according to  
207 the color keys shown in the inset of panel B.

208 **Figure 3. Maximum likelihood phylogenetic analysis of MpsA-TraG-SgaC-**  
209 **TraN (A), Int<sub>yicC</sub> (B), and Int<sub>dusA</sub> (C) encoded by SGI1-related GIs.** The trees  
210 are drawn to scale, with branch lengths measured in the number of substitutions  
211 per site over 2,637, 400, and 359 amino acid positions for concatenated MpsA-  
212 TraG-SgaC-TraN, Int<sub>yicC</sub>, and Int<sub>dusA</sub>, respectively. Bootstrap supports are  
213 indicated as percentages at the branching points only when > 80%. Taxa  
214 corresponding to GIs targeting *trmE* and *yicC* are accompanied by a light blue  
215 circle and a red circle, respectively. All other taxa correspond to *dusA*-specific  
216 GIs. The helper elements and mechanism of mobilization are indicated for each  
217 lineage according to the keys shown in the legend box of panel A. The inset of  
218 panel C shows logo sequences of *attL* and *attR* attachment sites generated with  
219 WebLogo [40], using alignments of sequences flanking the SGI<sub>dusA</sub> elements  
220 presented in Fig 1. The arrows indicate the island termini experimentally  
221 determined for the GI D1279779\_RGP05 of *A. baumannii* D1279779 by Farrugia

222 *et al.* [41]. Phylogenetic relationships of MpsA, TraG, SgaC and TraN proteins  
223 are shown separately in S2 Fig.

224 Phylogenetic analysis of Int<sub>dusA</sub> proteins confirmed that these GIs are exclusive to  
225 the *Vibrionaceae* and distinct from other *dusA*-specific GIs found in other taxa,  
226 including GI<sub>AcaBra1</sub> that encodes a MobI-like protein and is likely mobilizable by  
227 IncC plasmids [42] (Fig 3C). Sequence logos built using alignments of the *attL*  
228 and *attR* chromosomal junctions revealed a 21-bp imperfect repeat at the  
229 extremities of each GI (Fig 3C). This repeat is similar to the one reported for  
230 *dusA*-specific GIs found in a broader range of species [41].

231 Finally, Int<sub>yicC</sub> proteins of *yicC*-specific GIs form a cluster distinct from the  
232 integrases of GIs mobilizable by IncC plasmids through a MobI protein, and GIs  
233 that mimic the *oriT* of SXT/R391 ICEs [3,19,42] (Fig 3B).

### 234 **Non-canonical SGI1-like GIs carry AcaCD-responsive genes**

235 Considering the divergence of the 24 new GIs from prototypical SGI1, we  
236 wondered whether an IncC plasmid could mobilize them like SGI1. The hallmark  
237 of IncC-dependent mobilization is the presence of AcaCD-responsive promoters  
238 in IncC-mobilizable GIs. Hence, we searched for putative AcaCD-binding sites in  
239 the sequences of *trmE*-specific GIs (prototypical SGI1 was used as the positive  
240 control) and the *yicC*- and *dusA*-specific GIs. In these GIs, an AcaCD-binding  
241 motif was predicted upstream of *traN*, *traHG* (or *traG*), *S018*, and *xis* (or *rdfM* or  
242 *rdfN*) (Fig 1 and S3 Fig). Moreover, an AcaCD-binding motif was also predicted  
243 upstream of *trfA* in the *yicC*-specific GIs.

244 We cloned the promoter sequences of *int*, *traN*, *traG*, *S018*, and *rdfN* of  
245 MGIV*chUSA3* upstream of a promoterless *lacZ* reporter gene and monitored the  
246  $\beta$ -galactosidase activity with or without AcaCD. The promoter  $P_{int}$  was active  
247 regardless of the presence of AcaCD (Fig 4A). In contrast, the four other  
248 promoters exhibited weak activity in the absence of AcaCD. Upon induction of  
249 *acaDC* expression,  $P_{traN}$  and  $P_{S018}$  remained unresponsive, while the activities of  
250  $P_{traG}$  and  $P_{rdfN}$  increased 40 and 400 times, respectively (Fig 4B). The inertia of  
251  $P_{traN}$  and  $P_{S018}$  toward AcaCD could result from single nucleotide substitutions in  
252 the AcaCD binding site previously shown to be essential for recruiting the  
253 activator [28]: CC**S**AAAWW instead of CC**C**AAAWW in  $P_{traN}$  and CCC**C**AAAA instead of  
254 CCC**A**AAAA in  $P_{S018}$  (S3 Fig).

255 **Figure 4.  $\beta$ -galactosidase activities of the promoters  $P_{int}$ ,  $P_{traN}$ ,  $P_{traG}$ ,  $P_{S018}$**   
256 **and  $P_{rdfN}$  of MGIV*chUSA3* transcriptionally fused to *lacZ*.** (A) Colonies were  
257 grown on LB agar with or without arabinose to induce *acaDC* expression from  
258 pBAD-*acaDC*. (B) Induction levels of the same promoters in response to AcaCD.  
259  $\beta$ -galactosidase assays were carried out using the strains of panel A. Ratios  
260 between the enzymatic activities in Miller units for the arabinose-induced versus  
261 non-induced strains containing pBAD-*acaDC* are shown. The bars represent the  
262 mean and standard error of the mean of three independent experiments.

263 Hence, despite their divergence and different integration sites, these GIs share  
264 with SGI1 a common activation mechanism elicited by the presence of an IncC  
265 plasmid.

## 266 **IncC plasmids induce the excision and mobilization of MGIVchUSA3**

267 Next, we tested whether a coresident IncC plasmid could trigger the excision of  
268 MGIVchUSA3 from *dusA* in *V. cholerae* OY6PG08. The derepressed IncC  
269 plasmid pVCR94<sup>Kn</sup>  $\Delta$ *acr2* [43] was transferred by conjugation from *E. coli* KH40  
270 into OY6PG08. OY6PG08 Kn<sup>R</sup> transconjugants were isolated and tested by PCR  
271 to amplify the *attL* and *attR* chromosomal junctions, as well as the *attB* and *attP*  
272 sites resulting from the excision of MGIVchUSA3 (Fig 5A). Only three out of the  
273 eight tested transconjugants retained MGIVchUSA3, suggesting it was highly  
274 unstable and rapidly lost in IncC<sup>+</sup> OY6PG08 (Fig 5B). In contrast, the eight  
275 control IncC-free OY6PG08 clones yielded strong *attL* and *attR* signals but  
276 weaker *attB* and *attP* signals, indicating that MGIVchUSA3 spontaneously  
277 excised (Fig 5C).

278 **Figure 5. Excision of MGIVchUSA3 is enhanced in IncC<sup>+</sup> cells.** (A) Model of  
279 excision of MGIVchUSA3. (B and C) Detection of *attB*, *attP*, *attL* and *attR* sites  
280 by PCR in colonies of *V. cholerae* OYO6G08 bearing (lanes 9 to 16) or lacking  
281 (lanes 1 to 8) pVCR94<sup>Kn</sup>  $\Delta$ *acr2*. Control lanes: L, 1Kb Plus DNA ladder  
282 (Transgen Biotech); +, *V. cholerae* N16961 genomic DNA. (D) Detection of *attB*,  
283 *attP*, *attL* and *attR* sites by PCR in transconjugant colonies of *E. coli* CAG18439  
284 (lanes 1 to 4). L, 100bp Plus II DNA Ladder (Transgen Biotech)

285 To test the mobilization of MGIVchUSA3 from *V. cholerae* OY6PG08, we  
286 inserted a chloramphenicol resistance marker upstream of *traG*, generating  
287 MGIVchUSA3<sup>Cm</sup>, and used pVCR94<sup>Kn</sup>  $\Delta$ *acr2* as the helper plasmid.  
288 MGIVchUSA3<sup>Cm</sup> readily transferred to *E. coli* CAG18439 used as the recipient

289 strain ( $7.01 \times 10^{-5}$  transconjugant/donor). Amplification of the *attL* and *attR*  
290 junctions using *E. coli*-specific primers confirmed that MGIVchUSA3 integrates at  
291 *dusA* in *E. coli* (Fig 5D). Again, weak *attB* signal suggests spontaneous excision  
292 of MGIVchUSA3, whereas the stronger *attP* signals suggests the transient  
293 formation of tandem arrays or replication of the element in a subset of cells.

#### 294 **Excision of *dusA*-specific GIs depends on *rdfN***

295 To further characterize the biology of MGIVchUSA3, we measured its excision  
296 rate and copy number by qPCR, with and without coresident pVCR94<sup>Sp</sup>. We also  
297 monitored its transfer in the same context. Spontaneous excision of the island  
298 rarely occurred (<0.001% of the cells) (Fig 6A). In contrast, in the presence of the  
299 helper plasmid, the free *attB* site was detected in more than 67% of the cells  
300 confirming that the IncC plasmid elicits the excision of MGIVchUSA3<sup>Kn</sup>. Likewise,  
301 the presence of the plasmid resulted in a ~3-fold increase of the copy number of  
302 MGIVchUSA3<sup>Kn</sup> (Fig 6B), suggesting that the excised form of the island  
303 undergoes replication. The frequency of transfer of MGIVchUSA3<sup>Kn</sup> was  
304 comparable to that of the helper plasmid ( $\sim 3.5 \times 10^{-2}$  transconjugants/donor),  
305 while the frequency of cotransfer was more than two logs lower (Fig 6C).

306 **Figure 6. Effect of *acaDC* and *rdfN* on the IncC-dependent excision and**  
307 **mobilization of MGIVchUSA3.** (A) MGIVchUSA3<sup>Kn</sup> excision rate corresponds to  
308 the *attB*/chromosome ratio. (B) MGIVchUSA3<sup>Kn</sup> copy number corresponds to the  
309 *higA*/chromosome ratio. For panels A and B, all targets were amplified by qPCR  
310 alongside the three reference genes *trmE*, *hicB* and *dnaB*. All ratios were  
311 normalized using the control set to 1 and displayed in white. (C) Impact of *acaC*,

312 *acaDC*, *sgaC* and *rdfN* deletions on the mobilization of MGIVchUSA3.  
313 Conjugation assays were performed with CAG18439 (Tc) containing the  
314 specified elements as donor strains and VB112 (Rf) as the recipient strain. The  
315 bars represent the mean and standard error of the mean obtained from a  
316 biological triplicate.  $\alpha$  indicates that the excision rate or transfer frequency was  
317 below the detection limit. Statistical analyses were performed (on the logarithm of  
318 the values for panels A and C) using a one-way ANOVA with Dunnett's multiple  
319 comparison test. For panels A and C, statistical significance indicates  
320 comparisons to the normalization control. Statistical significance is indicated as  
321 follows: \*\*\*\*,  $P < 0.0001$ ; \*\*\*,  $P < 0.001$ ; \*\*,  $P < 0.01$ ; \*,  $P < 0.05$ ; ns, not  
322 significant. (D) Schematic representation of mini-GI inserted at the 5' end of  
323 *dusA*. (E) RdfN acts as a recombination directionality factor. Detection of *attB*,  
324 *attP*, *attL* and *attR* sites by PCR in colonies of *E. coli* EC100 *dusA*::mini-GI in the  
325 presence or absence of *rdfN*. L, 1Kb Plus DNA ladder (Transgen Biotech).

326 Thus far, the factors required to catalyze the excision of *dusA*-specific GIs have  
327 not been examined [41]. Whereas all *dusA*-specific GIs lack *xis* downstream of  
328 *int*, they carry a small ORF, here named *rdfN*, coding for a putative PrtN homolog  
329 (Fig 1) [41]. The deletion of *rdfN* abolished the excision and replication of  
330 MGIVchUSA3<sup>Kn</sup>. Complementation by ectopic expression of *rdfN* from the  
331 arabinose-inducible promoter  $P_{BAD}$  restored the wild-type excision level but not  
332 the replication (Fig 6A and 6B). Likewise, deletion of *rdfN* abolished the  
333 mobilization of MGIVchUSA3<sup>Kn</sup> but had no impact on the transfer of the helper  
334 plasmid (Fig 6C), confirming the specific role of *rdfN* in the GI's mobility.



335 To confirm that *rdfN* encodes the sole and only RDF of MGIVchUSA3, we  
336 constructed mini-GI, a minimal version of MGIVchUSA3 that only contains *int* and  
337 a spectinomycin-resistance marker. mini-GI is flanked by *attL* and *attR* and is  
338 integrated at *dusA* in *E. coli* EC100 (Fig 6D). Using mini-GI, *attB* and *attP* were  
339 detected only upon ectopic expression of *rdfN* from pBAD-*rdfN*, confirming that  
340 no other MGIVchUSA3-encoded protein besides Int and RdfN is required for the  
341 excision of the element (Fig 6E). *rdfN* is the essential RDF gene that favors the  
342 excision of MGIVchUSA3 and, most likely, all *dusA*-specific GIs.

### 343 **A SgaC/AcaD hybrid complex activates the excision and mobilization of** 344 **MGIVchUSA3**

345 Next, we investigated the role of the transcriptional activator genes *acaC* and  
346 *sgaC* in the mobilization of MGIVchUSA3. Deletion of *acaDC* abolished the  
347 excision and replication of MGIVchUSA3<sup>Kn</sup>, confirming that its excision relies on  
348 *rdfN*, whose expression is activated by AcaCD (Fig 4A, 6A and 6B). The mutation  
349 also confirmed that SgaC provided by MGIVchUSA3<sup>Kn</sup> is insufficient by itself to  
350 elicit *rdfN* expression. The excision rate remained extremely low in cells that lack  
351 the helper plasmid or cells that carry pVCR94<sup>Sp</sup>  $\Delta$ *acaDC*. However,  
352 MGIVchUSA3<sup>Kn</sup> allowed the low-frequency transfer of pVCR94<sup>Sp</sup>  $\Delta$ *acaDC* [19,28]  
353 (Fig 6C). Hence SgaC alone can activate to some degree the expression of the  
354 transfer genes of the helper plasmid. In contrast, deletion of *acaC* had no  
355 significant impact on the excision, replication, and mobilization of  
356 MGIVchUSA3<sup>Kn</sup>, or on the transfer of the helper plasmid (Fig 6A, 6B and 6C).  
357 The primary sequences of AcaC and SgaC from MGIVchUSA3 share 85%

358 identity over 94% coverage, whereas AcaC and SgaC from SGI1 share only 75%  
359 identity over 92% coverage. Hence AcaD produced by the plasmid and SgaC  
360 produced by the MGI likely generate a functional chimeric transcriptional complex  
361 that acts as a potent activator of *rdfN* and the transfer genes.

362 The transfer of MGIVchUSA3<sup>Kn</sup>  $\Delta$ *sgaC* decreased nearly 3 logs compared to the  
363 wild-type GI, despite the presence of *acaDC* on the helper plasmid (Fig 6C).  
364 Moreover, deletion of both *acaC* and *sgaC* nearly abolished all transfer. These  
365 observations confirm that *sgaC*, not *acaC*, combined with *acaD* produces a  
366 hybrid activator complex that is an essential for the excision and mobilization of  
367 the element.

### 368 **MGIVchUSA3 provides a new promoter and N-terminus for *dusA*** 369 **expression**

370 Since *dusA*-specific GIs insert within the 5' end of *dusA*, we wondered whether  
371 the gene remains expressed after the integration event. Sequence analysis of the  
372 *attR* junction of *E. coli* K12 transconjugants revealed that MGIVchUSA3 provides  
373 a new 5' coding sequence that diverges significantly from the native *E. coli* *dusA*  
374 gene (Fig 7A). This alteration of the 5' end of *dusA* results in a novel N-terminus  
375 of identical length sharing 61% identity over the 35 initial amino acid residues  
376 with native DusA. To test the expression of *dusA*, we constructed a translational  
377 *lacZ* fusion to its fortieth codon downstream of the *attR* junction in *E. coli*  
378 CAG18439 and BW25113 (Fig 7B).  $\beta$ -galactosidase assays revealed that *dusA*  
379 remains expressed after integration in both strains, confirming that MGIVchUSA3  
380 provides a new promoter (Fig 7C). However, we observed a statistically

381 significant reduction of *dusA* expression resulting from the integration of the GI in  
382 both strains, suggesting that the transcription or translation signals brought by  
383 the GI are weaker than the original ones upstream of *E. coli dusA*.

384 **Figure 7. MGIVchUSA3 drives the expression of *dusA*.** (A) Comparison of the  
385 coding sequences of the 5' end of *dusA* in *E. coli* K12 MG1655 before (*attB* site)  
386 and after (*attL* junction) the integration of MGIVchUSA3. The core sequence of  
387 the *attB* and *attL* recombination sites is indicated with red shading. The ATG start  
388 codon of *dusA* is shown in bold. The sequence shown in blue is internal to  
389 MGIVchUSA3. Amino acid residues shown in red differ from the native N-  
390 terminus of DusA. This sequence was obtained by sequencing the *attL* junction  
391 of an *E. coli* CAG18439 *dusA::MGIVchUSA3<sup>Kn</sup>* transconjugant colony. (B)  
392 Schematic representation of the *dusA'*-*lacZ* translational fusion for the detection  
393 of *dusA* expression. The fortieth codon of *dusA* (CAT shown in panel A) was  
394 fused to the eighth codon of *lacZ* downstream of the *attB* site. The gene *aadA7*  
395 (spectinomycin-resistance) was used for the insertion of *lacZ*. (C)  $\beta$ -  
396 galactosidase activity of the *dusA'*-*lacZ* fusion before (-) and after (+) insertion of  
397 MGIVchUSA3<sup>Kn</sup> in *E. coli* CAG18439 (FD034) and BW25113 (FD036). The bars  
398 represent the mean and standard error of the mean of three independent  
399 experiments. Statistical analyses were performed using an unpaired *t* test to  
400 compare the expression before and after integration of MGIVchUSA3<sup>Kn</sup> for each  
401 strain. Statistical significance is indicated as follows: \*\*,  $P < 0.01$ ; \*,  $P < 0.05$ .

## 402 Discussion

403 SGI1-like elements integrated at the 3' end of *trmE* are widespread in a broad  
404 range of *Enterobacteriaceae* and sporadically found in a few *Vibrio* species [12].  
405 The integrase of SGI1 and its variants occasionally targets the *sodB* gene, a  
406 secondary attachment site [44,45]. Here, we report the identification of distant  
407 SGI1-like elements that specifically target the 5' end of *dusA* in multiple *Vibrio*  
408 species and the 3' end of *yicC* in *Enterobacteriaceae* and *Balneatricaceae*.  
409 Farrugia *et al.* [41] already described GIs integrated at the 5' end of *dusA*, mostly  
410 prophages or phage remnants found exclusively in *Alpha*-, *Beta*- and  
411 *Gammaproteobacteria*. These authors identified GIVchBan1 and GIVchBra2 in *V.*  
412 *cholerae*, and several other GIs predicted to encode conjugative functions in  
413 *Bradyrhizobium*, *Caulobacter*, *Mesorhizobium*, *Paracoccus*, *Pseudomonas*, and  
414 *Rhodomicrobium* [41]. Our group recently reported a *dusA*-specific GI in  
415 *Aeromonas caviae* 8LM potentially mobilizable by IncC plasmids [42]. GIAca8LM  
416 lacks *tra* genes but encodes a mobilization protein (Mobl) under the control of an  
417 AcaCD-responsive promoter. Together, these reports confirm that *dusA* is an  
418 insertion hotspot for distinct families of mobile elements across at least three  
419 *Proteobacteria* phyla.

420 Thus far, only the *dusA*-specific GIs in *Acinetobacter baumannii* D1279779 and  
421 *Pseudomonas protegens* Pf-5 were shown to excise from the chromosome,  
422 albeit at a low level [41]. Neither GI has been tested for intercellular mobility.  
423 Here, we characterized MGIVchUSA3, a representative member of a subgroup of  
424 *dusA*-specific GIs circulating in *Vibrio* species and distantly related to SGI1. We

425 demonstrated that MGIV*ch*USA3 is mobilizable by IncC conjugative plasmids to  
426 *E. coli*. In the presence of an IncC plasmid, this GI excises in practically all cells  
427 of the population and becomes highly unstable (Figs 5B and 6A). We showed  
428 that its excision was under the control of AcaCD provided by the IncC plasmid  
429 and required *rdfN*, a gene whose expression is driven by an AcaCD-responsive  
430 promoter (Fig 4). *rdfN* encodes a novel RDF distantly related to the pyocin  
431 activator protein PrtN of *Pseudomonas*. *rdfN* seems to be ubiquitous, yet highly  
432 divergent, in *dusA*-specific GIs reported by Farrugia *et al.* [41]. For instance,  
433 RdfN (PrtN) encoded by the GI of *P. protegens* Pf-5 shares only 29% identity  
434 with RdfN of MGIV*ch*USA3, and their promoters are unrelated. Hence, the  
435 expression of *rdfN* homologs encoded by different families of *dusA*-specific GIs is  
436 likely controlled by different factors. Only the *dusA*-specific GIs mobilizable by  
437 IncC plasmids are expected to be regulated by an AcaCD-like complex.

438 Excision and mobilization of MGIV*ch*USA3 occurred in the presence of a  $\Delta$ *acaC*  
439 but not a  $\Delta$ *acaDC* mutant of the helper plasmid (Fig 6), confirming that *sgaC* of  
440 the GI produces a functional activator subunit that can interact with AcaD  
441 provided by the plasmid. Furthermore, we showed here that, unlike *acaC*, *sgaC*  
442 plays a central role in the biology of MGIV*ch*USA3 as the absence of *acaC* had  
443 no effect on the excision or transfer of the GI, while the absence of *sgaC* in spite  
444 of the presence of *acaC*, compromised the mobilization of the GI (Fig. 6A, 6B  
445 and 6C). We recently showed that AcaD most likely stabilizes the binding of  
446 AcaC to the DNA [28]. Therefore, AcaD and SgaC from MGIV*ch*USA3 likely  
447 interact to form a chimerical activator complex. This interaction could

448 compensate for the loss of *sgaD* in *yicC*- and type 1 and 2 *dusA*-specific GIs (Fig  
449 1). The primary sequences of AcaC and SgaC of MGIVchUSA3 (type 1) share  
450 85% identity. In contrast, AcaC only shares 75% identity with SgaC of SGI1 and  
451 64% identity with SgaC of GIVchUSA5 (type 3), suggesting that retention of *sgaD*  
452 allowed faster divergence of SgaC from AcaC. Retention of *sgaC* in the GIs  
453 could result from its essential role as the elicitor of excision and replication  
454 reported for SGI1. Indeed, although AcaCD binds to the promoters  $P_{xis}$  and  $P_{rep}$   
455 of SGI1, it fails to initiate transcription at these two promoters, unlike SgaCD [28].  
456 Nonetheless,  $P_{xis}$  and  $P_{rep}$  are not conserved in the GIs described here. *S004-rep*  
457 is missing, whereas *rdfN* or *rdfM* replaced *xis* with novel AcaCD-responsive  
458 promoters (Fig 4 and S3 Fig). This observation raises intriguing questions  
459 regarding the recruitment of functional gene cassettes and their assimilation in a  
460 regulatory pathway. How did *xis*, *rdfN*, and *rdfM* acquire their AcaCD-responsive  
461 promoters? Is it by convergent evolution? What are the signals driving *rdfN*  
462 expression and GI excision in *dusA*-specific GIs resembling prophages?

463 Approximately 3 copies per cell of MGIVchUSA3 were detected in the presence  
464 of the helper IncC plasmid (Fig 6B), lower than the copy number reported for  
465 SGI1 (~8 copies/cell) [26,28]. MGIVchUSA3 lacks SGI1's replication (*S004-rep-oriV*);  
466 however, one of the multiple genes of unknown function could encode an  
467 unidentified replication initiator protein. Notably, GIVchO27-1 encodes a putative  
468 replication protein with an N-terminal replicase domain (PF03090) and a C-  
469 terminal primase domain (PriCT-1, PF08708) [26]. Multiple GIs also carry  
470 putative replicons based on *repA* and *trfA* (Fig 1), suggesting that independent

471 replication is crucial in the lifecycle of these GIs, perhaps to improve their stability  
472 in the presence of their helper plasmid [26–30].

473 Farrugia *et al.* [41] hypothesized that *dusA*-specific GIs could restore the  
474 functioning of *DusA*. We demonstrated here that *MGIVchUSA3* provides a new  
475 promoter allowing expression of *dusA*, though at a lower level than in GI-free  
476 cells, and restores the open reading frame with an altered N-terminus (Fig 7).

477 Similarly, the ICE SXT that targets the 5' end of the peptide chain release factor  
478 3 (RF3) gene *prfC* provides a new promoter and N-terminus in both *V. cholerae*,  
479 its original host, and *E. coli* [46]. In both cases, the consequences of the  
480 alteration of the N-terminus on the activity of the protein remain unknown.

481 The relative positions of *int* and *rdfN/rdfM* across the *attP* site suggest that to  
482 remain functional the recombination modules must be acquired or exchanged  
483 when the GIs are in their excised circular form. The promiscuity of different  
484 families of GIs targeting *yicC*, *dusA*, and *trmE* and mobilizable by *IncC* plasmids  
485 could act as the catalyst for these recombination events. During entry into a new  
486 host cell by conjugation, *IncC* plasmids elicit the excision of such GIs and  
487 promote homologous recombination between short repeated sequences in  
488 response to double-stranded break induced by host defense systems (CRISPR-  
489 Cas3) [43]. Hence the diversification of *IncC* plasmid-mobilizable GIs could be a  
490 side effect of the DNA repair mechanism used by these plasmids.

491 Unlike SGI1 and its siblings, all *dusA*-specific SGI1-like GIs reported here lack  
492 antibiotic resistance genes. Furthermore, SGI1 variants are prevalent in several

493 pathogenic species and relatively well-conserved, whereas their *dusA*-specific  
494 relatives are scarce and highly divergent. These observations suggest that  
495 despite the considerable functional resemblances between *trmE*- and *dusA*-  
496 specific SGI1-like GIs, the epidemiological success of the SGI1 lineage has  
497 directly stemmed from the acquisition of class I integrons conferring multidrug  
498 resistance by forerunner elements such as SGI0 [47]. Based on the analysis of  
499 phylogenetic relationships between the core proteins MpsA, TraG, SgaC and  
500 TraN, *oriT* loci, and integrase proteins (Fig 3 and S1A Fig), we propose a  
501 hypothetical evolutionary pathway leading to the emergence of the different types  
502 of GIs described here (Fig 8). The diversity of *dusA*-specific GIs and relative  
503 homogeneity of the SGI1 group suggest that the latter originated from the  
504 progenitor of IncA and IncC plasmids via a *dusA*-specific GI intermediate.

505 **Figure 8. Proposed hypothetical evolutionary pathway of SGI1-like GIs.** The  
506 sequence of events was inferred from the phylogenetic trees presented in this  
507 study, site of integration and conservation of *traH* and *sgaD* in the GIs. The  
508 proposed pathway ignores the gene cargo and presumes that the GI lineages  
509 evolved from the progenitor of IncA and IncC plasmids. The *dusA*-specific  
510 recombination module was chosen as the progenitor to minimize gain/loss and  
511 recombination events. Green and red arrows indicate gene gains and losses,  
512 respectively. The orange dashed line indicates a probable recombination event  
513 from which stemmed GIVchO27-1.



## 514 **Materials and Methods**

### 515 **Bacterial strains and media**

516 Bacterial strains and plasmids used in this study are described in Table 1. Strains  
517 were routinely grown in lysogeny broth at 37°C in an orbital shaker/incubator and  
518 were preserved at -75°C in LB broth containing 20% (vol/vol) glycerol. Antibiotics  
519 were used at the following concentrations: ampicillin (Ap), 100 µg/ml;  
520 chloramphenicol (Cm), 20 µg/ml; erythromycin (Em), 200 µg/ml; kanamycin (Kn),  
521 10 µg/ml for single-copy integrants of pOP/*acZ*-derived constructs, 50 µg/ml  
522 otherwise; nalidixic acid (Nx), 40 µg/ml; rifampicin (Rf), 50 µg/ml; spectinomycin  
523 (Sp), 50 µg/ml; tetracycline (Tc), 12 µg/ml. Diaminopimelate (DAP) was  
524 supplemented to a final concentration of 0.3 mM when necessary.

### 525 **Mating assays**

526 Conjugation assays were performed as previously described [31]. However,  
527 mixtures of donor and recipient cells were incubated on LB agar plates at 37°C  
528 for 4 hours. Donors and recipients were selected according to their sole  
529 chromosomal markers. When required, mating experiments were performed  
530 using LB agar plates supplemented with 0.02% arabinose to induce expression  
531 of pBAD30-derived complementation vectors. Frequencies of transconjugant  
532 formation were calculated as ratios of transconjugant per donor CFUs from three  
533 independent mating experiments.

### 534 **Molecular biology**

535 Plasmid DNA was prepared using the QIAprep Spin Miniprep Kit (Qiagen),  
536 according to manufacturer's instructions. Restriction enzymes used in this study

537 were purchased from New England Biolabs. Q5 DNA polymerase (New England  
538 Biolabs) and EasyTaq DNA Polymerase (Civic Bioscience) were used for  
539 amplifying cloning inserts and verification, respectively. PCR products were  
540 purified using the QIAquick PCR Purification Kit (Qiagen), according to  
541 manufacturer's instructions. *E. coli* was transformed by electroporation as  
542 described by Dower *et al.* [48] in a Bio-Rad GenePulser Xcell apparatus set at 25  
543  $\mu\text{F}$ , 200  $\Omega$  and 1.8 kV using 1-mm gap electroporation cuvettes. Sanger  
544 sequencing reactions were performed by the Plateforme de Séquençage et de  
545 Génotypage du Centre de Recherche du CHUL (Québec, QC, Canada).

#### 546 **Plasmids and strains constructions**

547 Oligonucleotides used in this study are listed in Table 2. MGIV*ch*USA3<sup>Cm</sup> was  
548 constructed by inserting the *pir*-dependent replication RP4-mobilizable plasmid  
549 pSW23T [49] at locus CGT85\_RS05425 of *V. cholerae* OYP6G08 (Genbank  
550 NZ\_NMSY01000009) by homologous recombination. Briefly, CGT85\_RS05425  
551 was amplified using primer pair dusAigEcoRIF/dusAigEcoRIR. The amplicon was  
552 digested with EcoRI and cloned into EcoRI-digested pSW23T using T4 DNA  
553 ligase. The resulting plasmid was confirmed by restriction profiling and DNA  
554 sequencing, then introduced into the DAP-auxotrophic *E. coli*  $\beta$ 2163 by  
555 transformation [49]. This strain was used as a donor in a mating assay to transfer  
556 the plasmid into *V. cholerae* OYP6G08, generating MGIV*ch*USA3<sup>Cm</sup>. Single-copy  
557 integration of the pSW23T derivative was confirmed by PCR and antibiotic  
558 resistance profiling.

559 MGIVchUSA3<sup>Kn</sup> was constructed from MGIVchUSA3<sup>Cm</sup>. Briefly, pVCR94<sup>Kn</sup>  $\Delta$ acr2  
560 was transferred from the DAP-auxotrophic *E. coli* KH40 into OYP6G08 bearing  
561 MGIVchUSA3<sup>Cm</sup>. After selection on LB agar medium supplemented with  
562 chloramphenicol and kanamycin, Cm<sup>R</sup> Kn<sup>R</sup> *V. cholerae* OYP6G08  
563 transconjugants were confirmed by growth on thiosulfate-citrate-bile salts-  
564 sucrose (TCBS) agar medium (Difco). MGIVchUSA3<sup>Cm</sup> was then mobilized from  
565 OYP6G08 to *E. coli* CAG18439. Integration at the 5' end of *dusA* in *E. coli* was  
566 confirmed by amplification of the *attL*, *attR*, *attB* and *attP* sites with primer pairs  
567 EcodusAattLf/ dusAattLr, dusAattRf/EcodusAattRr, EcodusAattLf/EcodusAattRr  
568 and dusAattRf/ dusAattLr, respectively. MGIVchUSA3<sup>Kn</sup> was constructed by  
569 replacing pSW23T with a single kanamycin resistance marker using the one-step  
570 chromosomal gene inactivation technique with primer pair  
571 dusAscarNoFRTf/dusAscarNoFRTTr and pKD13 as the template. The deletions  
572  $\Delta$ sgaC and  $\Delta$ prtN in MGIVchUSA3<sup>Kn</sup> were obtained using the primer pairs  
573 oFD26r/oFD26f and DelprtNr/DelprtNf, and pKD3 and pVI36 as the templates,  
574 respectively. The  $\Delta$ dapA deletion mutant of *E. coli* MG1655 was constructed  
575 using primer pair FwDeltaDapA-MG1655/ RvDeltaDapA-MG1655 and pKD3 as  
576 the template. The  $\Delta$ lacZ mutation was introduced in *E. coli* CAG18439 using  
577 primer pair lacZW-B/lacZW-F and plasmid pKD4 as the template. The *dusA*'-  
578 'lacZ fusion was introduced in *E. coli* BW25113 and CAG18439 using primer pair  
579 oDF15/oDF16 and pVI42B as the template. The  $\lambda$ Red recombination system was  
580 expressed using either pSIM6, pSIM9 or pKD46 [50,51]. When appropriate,  
581 resistance cassettes were excised from the resulting constructions using the Flp-

582 encoding plasmid pCP20 [52]. All deletions were validated by antibiotic profiling  
583 and PCR.

584 Fragments encompassing promoter regions upstream of *int*, *traN*, *traG*, *s018* and  
585 *rdfN* were amplified using primer pairs oFD6.f/oFD6.r, oFD1.f/oFD1.r,  
586 oFD3.f/oFD3.r, oFD5.f/oFD5.r and oFD4.f/oFD4.r, respectively, and genomic  
587 DNA from *E. coli* CAG18439 *dusA*::MGIVchUSA3<sup>Kn</sup> as the template. The  
588 amplicons were digested with PstI/XhoI and cloned into PstI/XhoI-digested  
589 pOP/lacZ [19]. The resulting constructs were single-copy integrated into the *attB<sub>λ</sub>*  
590 chromosomal site of *E. coli* BW25113 using pINT-ts [53].

591 mini-GI was constructed as follows. The 1,591-bp fragment of excised circular  
592 MGIVchUSA3<sup>Kn</sup> that contains *attP-int* was amplified using primer pair  
593 oVB12/oVB10 and genomic DNA from *E. coli* CAG18439 *dusA*::MGIVchUSA3<sup>Kn</sup>  
594 as the template. The 1,421-bp fragment of pVI36 that contains *aadA7* was  
595 amplified using primer pair oVB11/oVB13. Both fragments were joined using the  
596 PCR-based overlap extension method [54]. After the final PCR amplification  
597 using oVB12/oVB13, the amplicon was purified, digested with SacI, and ligated.  
598 The ligation mixture was then transformed into *E. coli* EC100. Transformant  
599 colonies were selected on LB agar supplemented with spectinomycin. The  
600 constitutive expression of *int* and the absence of replicon prompted the  
601 spontaneous integration of mini-GI at the 5' end of *dusA* in EC100.

602 All final constructs were verified by PCR and DNA sequencing by the Plateforme  
603 de Séquençage et de Génotypage du Centre de Recherche du CHUL (Québec,  
604 QC, Canada).

#### 605 **qPCR assays**

606 qPCR assays for quantification of excision and copy number of MGIV*chUSA3*<sup>Kn</sup>  
607 were carried out as described previously [28] with the following modification.  
608 *attB<sub>dusA</sub>* (241 bp) and *higA* (229 bp) of MGIV*chUSA3*<sup>Kn</sup> were quantified using  
609 primer pairs *attB<sub>dusA</sub>qPCRfwd/ attB<sub>dusA</sub>qPCRrev* and *higAqPCRfwd/*  
610 *higAqPCRrev*, respectively (Table 1). The excision rate and copy number of  
611 MGIV*chUSA3*<sup>Kn</sup> were calculated as the ratio of free *attB<sub>dusA</sub>* site per chromosome  
612 and as the ratio of *higA* per chromosome, respectively. The data were analyzed  
613 and normalized using all three chromosomal genes *dnaB*, *hicB* and *trmE* as  
614 references and the qBase framework as described previously [28,55].

#### 615 **β-galactosidase assays**

616 The assays were carried out on LB agar plates supplemented with 5-bromo-4-  
617 chloro-3-indolyl-β-D-galactopyranoside (X-gal) or in LB broth using *o*-nitrophenyl-  
618 β-D-galactopyranoside (ONPG) as the substrate as described previously [42].  
619 *acaDC* expression from pBAD-*acaDC* was induced by adding 0.2% arabinose to  
620 a refreshed culture grown to an OD<sub>600</sub> of 0.2, followed by a 2-h incubation at  
621 37°C with shaking prior to cell sampling.

## 622 **Comparative analyses**

623 Sequences were obtained using Blastp against the Genbank Refseq database  
624 with the primary sequences of key proteins MpsA, TraG<sub>S</sub>, SgaC, TraN<sub>S</sub> of SGI1  
625 (Genbank AAK02039.1, AAK02037.1, AAK02036.1, AAK02035.1, respectively),  
626 and ultimately Int<sub>dusA</sub> of GIVchBra2 (Genbank EEO15317.1) and Int<sub>yicC</sub> of  
627 GIEcoMOD1 (Genbank WP\_069140142.1). Hits were exported, then sorted by  
628 accession number to identify gene clusters that likely belong to complete GIs.  
629 Sequences of GIs were manually extracted and the extremities were identified by  
630 searching for the direct repeats contained in *attL* and *attR* sites. When a GI  
631 sequence spanned across two contigs (e.g., GIVchHai10 and GIPp/Ind1), the  
632 sequence was manually assembled. GI sequences were clustered using cd-hit-  
633 est with a 0.95 nucleotide sequence identity cut-off [56]. Some of the annotated  
634 sequences were manually curated to correct missing small open reading frames  
635 such as *mpsB*, and inconsistent start codons.

636 Circular blast representations were generated with the Blast Ring Image  
637 Generator (BRIG) 0.95 [39], with blastn or blastp, against SGI1ΔIn104 and  
638 GIVchUSA2, with an upper identity threshold of 80% and a lower identity  
639 threshold of 60%.

640 Evolutionary analyses were conducted in MEGA X [57] and inferred by using the  
641 maximum likelihood method based on the JTT (MpsA or SgaC proteins), LG  
642 (Int<sub>dusA</sub>, Int<sub>yicC</sub>, TraG or RepA<sub>IncFII</sub> proteins) or WAG (TraN) matrix-based models  
643 [58–60]. Protein sequences were aligned with Muscle [61]. Aligned sequences  
644 were trimmed using trimal version 1.2 using the automated heuristic approach

645 [62]. Initial tree(s) for the heuristic search were obtained automatically by  
646 applying Neighbor-Join and BioNJ algorithms to a matrix of pairwise distances  
647 estimated using a JTT model, and then selecting the topology with the superior  
648 log likelihood value. A discrete Gamma distribution was used to model  
649 evolutionary rate differences among sites (5 categories) for  $\text{Int}_{dusA}$  (parameter =  
650 3.5633),  $\text{Int}_{yicC}$  (parameter = 2.6652), SgaC (parameter = 1.4064), TraG  
651 (parameter = 1.9005) and TraN (parameter = 1.6476) proteins. For  $\text{Int}_{dusA}$ , MpsA  
652 and TraG, the rate variation model allowed for some sites to be evolutionarily  
653 invariable ([+I], 7.81% sites for  $\text{Int}_{dusA}$ , 44.62% sites for MpsA and 5.22% sites for  
654 TraG<sub>S</sub>). The trees are all drawn to scale, with branch lengths measured in the  
655 number of substitutions per site.

656 *oriT* sequences were obtained manually using the previously identified *oriT* of  
657 SGI1 as the reference [25], then clustered using cd-hit-est with a 1.0 nucleotide  
658 sequence identity cut-off. Sequences were then aligned using Muscle and a  
659 NeighborNet phylogenetic network was built using SplitsTree4 [63] with default  
660 parameters (Uncorrected\_P method for distances and EqualAngle drawing  
661 method). The secondary structures of the aligned *oriT* sequences were predicted  
662 using RNAalifold 2.4.17 from the ViennaRNA package [64]. Default options were  
663 used (including no RIBOSUM scoring), except for the following: no substituting  
664 "T" for "U" (--noconv), no lonely pairs (--noLP), no GU pairs (--noGU) and DNA  
665 parameters (-P DNA). The predicted Vienna output and the annotated alignment  
666 were merged into a predicted secondary structure of SGI1 *oriT* color-coded to  
667 display the inter-island diversity.

668 **Statistical analyses and figures preparation**

669 Prism 8 (GraphPad Software) was used to plot graphics and to carry out  
670 statistical analyses. All figures were prepared using Inkscape 1.0  
671 (<https://inkscape.org/>).

672

673 **Acknowledgments**

674 We are grateful to Yann Boucher for the kind gift of *Vibrio cholerae* OYP6G08  
675 and Kévin T. Huguet for technical assistance. We thank Nicolas Rivard and  
676 David Roy for their insightful comments on the manuscript.



## 677 References

- 678 1. Bellanger X, Payot S, Leblond-Bourget N, Guédon G. Conjugative and  
679 mobilizable genomic islands in bacteria: evolution and diversity. FEMS  
680 Microbiol Rev. 2014;38: 720–760. doi:10.1111/1574-6976.12058
- 681 2. Guédon G, Libante V, Coluzzi C, Payot S, Leblond-Bourget N. The Obscure  
682 World of Integrative and Mobilizable Elements, Highly Widespread Elements  
683 that Pirate Bacterial Conjugative Systems. Genes. 2017;8: 337.  
684 doi:10.3390/genes8110337
- 685 3. Daccord A, Ceccarelli D, Burrus V. Integrating conjugative elements of the  
686 SXT/R391 family trigger the excision and drive the mobilization of a new  
687 class of *Vibrio* genomic islands. Mol Microbiol. 2010;78: 576–588.  
688 doi:10.1111/j.1365-2958.2010.07364.x
- 689 4. Daccord A, Ceccarelli D, Rodrigue S, Burrus V. Comparative analysis of  
690 mobilizable genomic islands. J Bacteriol. 2013;195: 606–614.  
691 doi:10.1128/JB.01985-12
- 692 5. Waldor MK. Mobilizable genomic islands: going mobile with *oriT* mimicry.  
693 Mol Microbiol. 2010;78: 537–540. doi:10.1111/j.1365-2958.2010.07365.x
- 694 6. Brouwer MSM, Warburton PJ, Roberts AP, Mullany P, Allan E. Genetic  
695 organisation, mobility and predicted functions of genes on integrated, mobile  
696 genetic elements in sequenced strains of *Clostridium difficile*. PLoS ONE.  
697 2011;6: e23014. doi:10.1371/journal.pone.0023014
- 698 7. Carraro N, Rivard N, Ceccarelli D, Colwell RR, Burrus V. IncA/C Conjugative  
699 Plasmids Mobilize a New Family of Multidrug Resistance Islands in Clinical  
700 *Vibrio cholerae* Non-O1/Non-O139 Isolates from Haiti. mBio. 2016;7:  
701 e00509-16. doi:10.1128/mBio.00509-16
- 702 8. Boyd DA, Peters GA, Ng L, Mulvey MR. Partial characterization of a  
703 genomic island associated with the multidrug resistance region of  
704 *Salmonella enterica* Typhimurium DT104. FEMS Microbiol Lett. 2000;189:  
705 285–291. doi:10.1111/j.1574-6968.2000.tb09245.x
- 706 9. Boyd D, Peters GA, Cloeckert A, Boumedine KS, Chaslus-Dancla E,  
707 Imberechts H, et al. Complete nucleotide sequence of a 43-kilobase  
708 genomic island associated with the multidrug resistance region of  
709 *Salmonella enterica* serovar Typhimurium DT104 and its identification in  
710 phage type DT120 and serovar Agona. J Bacteriol. 2001;183: 5725–5732.  
711 doi:10.1128/JB.183.19.5725-5732.2001
- 712 10. Grim CJ, Hasan NA, Taviani E, Haley B, Chun J, Brettin TS, et al. Genome  
713 sequence of hybrid *Vibrio cholerae* O1 MJ-1236, B-33, and CIRS101 and

- 714 comparative genomics with *V. cholerae*. J Bacteriol. 2010;192: 3524–3533.  
715 doi:10.1128/JB.00040-10
- 716 11. Cummins ML, Hamidian M, Djordjevic SP. *Salmonella* Genomic Island 1 is  
717 Broadly Disseminated within Gammaproteobacteriaceae. Microorganisms.  
718 2020;8: 161. doi:10.3390/microorganisms8020161
- 719 12. de Curraize C, Siebor E, Neuwirth C. Genomic islands related to *Salmonella*  
720 genomic island 1; integrative mobilisable elements in *trmE* mobilised in trans  
721 by A/C plasmids. Plasmid. 2021;114: 102565.  
722 doi:10.1016/j.plasmid.2021.102565
- 723 13. Mulvey MR, Boyd DA, Olson AB, Doublet B, Cloeckert A. The genetics of  
724 *Salmonella* genomic island 1. Microbes and Infection. 2006;8: 1915–1922.  
725 doi:10.1016/j.micinf.2005.12.028
- 726 14. Hall RM. *Salmonella* genomic islands and antibiotic resistance in *Salmonella*  
727 *enterica*. Future Microbiol. 2010;5: 1525–1538. doi:10.2217/fmb.10.122
- 728 15. Doublet B, Boyd D, Mulvey MR, Cloeckert A. The *Salmonella* genomic  
729 island 1 is an integrative mobilizable element. Mol Microbiol. 2005;55: 1911–  
730 1924. doi:10.1111/j.1365-2958.2005.04520.x
- 731 16. Douard G, Praud K, Cloeckert A, Doublet B. The *Salmonella* genomic  
732 island 1 is specifically mobilized in trans by the IncA/C multidrug resistance  
733 plasmid family. PLoS ONE. 2010;5: e15302.  
734 doi:10.1371/journal.pone.0015302
- 735 17. Harmer CJ, Hall RM. The A to Z of A/C plasmids. Plasmid. 2015;80: 63–82.  
736 doi:10.1016/j.plasmid.2015.04.003
- 737 18. Wu W, Feng Y, Tang G, Qiao F, McNally A, Zong Z. NDM Metallo- $\beta$ -  
738 Lactamases and Their Bacterial Producers in Health Care Settings. Clin  
739 Microbiol Rev. 2019;32: e00115-18. doi:10.1128/CMR.00115-18
- 740 19. Carraro N, Matteau D, Luo P, Rodrigue S, Burrus V. The master activator of  
741 IncA/C conjugative plasmids stimulates genomic islands and multidrug  
742 resistance dissemination. PLoS Genet. 2014;10: e1004714.  
743 doi:10.1371/journal.pgen.1004714
- 744 20. Kiss J, Papp PP, Szabó M, Farkas T, Murányi G, Szakállas E, et al. The  
745 master regulator of IncA/C plasmids is recognized by the *Salmonella*  
746 Genomic island SGI1 as a signal for excision and conjugal transfer. Nucleic  
747 Acids Res. 2015;43: 8735–8745. doi:10.1093/nar/gkv758
- 748 21. Doublet B, Praud K, Weill F-X, Cloeckert A. Association of IS26-composite  
749 transposons and complex In4-type integrons generates novel multidrug

- 750 resistance loci in *Salmonella* genomic island 1. J Antimicrob Chemother.  
751 2009;63: 282–289. doi:10.1093/jac/dkn500
- 752 22. de Curraize C, Neuwirth C, Bador J, Chapuis A, Amoureux L, Siebor E. Two  
753 new *Salmonella* genomic islands 1 from *Proteus mirabilis* and description of  
754 blaCTX-M-15 on a variant (SGI1-K7). J Antimicrob Chemother. 2018;73:  
755 1804–1807. doi:10.1093/jac/dky108
- 756 23. de Curraize C, Siebor E, Varin V, Neuwirth C, Hall RM. Two New SGI1-LK  
757 Variants Found in *Proteus mirabilis* and Evolution of the SGI1-HKL Group of  
758 *Salmonella* Genomic Islands. mSphere. 2020;5: e00875-19.  
759 doi:10.1128/mSphere.00875-19
- 760 24. Lei C-W, Chen Y-P, Kong L-H, Zeng J-X, Wang Y-X, Zhang A-Y, et al. PGI2  
761 Is a Novel SGI1-Relative Multidrug-Resistant Genomic Island Characterized  
762 in *Proteus mirabilis*. Antimicrob Agents Chemother. 2018;62: e00019-18,  
763 /aac/62/5/e00019-18.atom. doi:10.1128/AAC.00019-18
- 764 25. Kiss J, Szabó M, Hegyi A, Douard G, Praud K, Nagy I, et al. Identification  
765 and Characterization of *oriT* and Two Mobilization Genes Required for  
766 Conjugative Transfer of *Salmonella* Genomic Island 1. Front Microbiol.  
767 2019;10: 457. doi:10.3389/fmicb.2019.00457
- 768 26. Huguet KT, Rivard N, Garneau D, Palanee J, Burrus V. Replication of the  
769 *Salmonella* Genomic Island 1 (SGI1) triggered by helper IncC conjugative  
770 plasmids promotes incompatibility and plasmid loss. Hughes D, editor. PLoS  
771 Genet. 2020;16: e1008965. doi:10.1371/journal.pgen.1008965
- 772 27. Szabó M, Murányi G, Kiss J. IncC helper dependent plasmid-like replication  
773 of *Salmonella* Genomic Island 1. Nucleic Acids Research. 2021;49: 832–  
774 846. doi:10.1093/nar/gkaa1257
- 775 28. Durand R, Huguet KT, Rivard N, Carraro N, Rodrigue S, Burrus V. Crucial  
776 role of *Salmonella* genomic island 1 master activator in the parasitism of  
777 IncC plasmids. Nucleic Acids Res. 2021; in press. doi:10.1093/nar/gkab204
- 778 29. Huguet KT, Gonnet M, Doublet B, Cloeckert A. A toxin antitoxin system  
779 promotes the maintenance of the IncA/C-mobilizable *Salmonella* Genomic  
780 Island 1. Sci Rep. 2016;6: 32285. doi:10.1038/srep32285
- 781 30. Harmer CJ, Hamidian M, Ambrose SJ, Hall RM. Destabilization of IncA and  
782 IncC plasmids by SGI1 and SGI2 type *Salmonella* genomic islands.  
783 Plasmid. 2016;87–88: 51–57. doi:10.1016/j.plasmid.2016.09.003
- 784 31. Carraro N, Durand R, Rivard N, Anquetil C, Barrette C, Humbert M, et al.  
785 *Salmonella* genomic island 1 (SGI1) reshapes the mating apparatus of IncC  
786 conjugative plasmids to promote self-propagation. PLOS Genetics. 2017;13:  
787 e1006705. doi:10.1371/journal.pgen.1006705

- 788 32. Humbert M, Huguet KT, Coulombe F, Burrus V. Entry Exclusion of  
789 Conjugative Plasmids of the IncA, IncC, and Related Untyped Incompatibility  
790 Groups. *J Bacteriol.* 2019;201: e00731-18. doi:10.1128/JB.00731-18
- 791 33. Roberts AP, Johanesen PA, Lyras D, Mullany P, Rood JI. Comparison of  
792 Tn5397 from *Clostridium difficile*, Tn916 from *Enterococcus faecalis* and the  
793 CW459tet(M) element from *Clostridium perfringens* shows that they have  
794 similar conjugation regions but different insertion and excision modules.  
795 *Microbiology.* 2001;147: 1243–1251. doi:10.1099/00221287-147-5-1243
- 796 34. Burrus V, Pavlovic G, Decaris B, Guédon G. The ICESt1 element of  
797 *Streptococcus thermophilus* belongs to a large family of integrative and  
798 conjugative elements that exchange modules and change their specificity of  
799 integration. *Plasmid.* 2002;48: 77–97. doi:10.1016/s0147-619x(02)00102-6
- 800 35. Taviani E, Spagnoletti M, Ceccarelli D, Haley BJ, Hasan NA, Chen A, et al.  
801 Genomic analysis of ICEVchBan8: An atypical genetic element in *Vibrio*  
802 *cholerae*. *FEBS Lett.* 2012;586: 1617–1621.  
803 doi:10.1016/j.febslet.2012.03.064
- 804 36. Bioteau A, Durand R, Burrus V. Redefinition and unification of the SXT/R391  
805 Family of integrative and conjugative elements. *Appl Environ Microbiol.*  
806 2018;84: pii: e00485-18. doi:10.1128/AEM.00485-18
- 807 37. Daccord A, Mursell M, Poulin-Laprade D, Burrus V. Dynamics of the SetCD-  
808 regulated integration and excision of genomic islands mobilized by  
809 integrating conjugative elements of the SXT/R391 family. *J Bacteriol.*  
810 2012;194: 5794–5802. doi:10.1128/JB.01093-12
- 811 38. Thorsted PB, Shah DS, Macartney D, Kostelidou K, Thomas CM.  
812 Conservation of the genetic switch between replication and transfer genes of  
813 IncP plasmids but divergence of the replication functions which are major  
814 host-range determinants. *Plasmid.* 1996;36: 95–111.  
815 doi:10.1006/plas.1996.0037
- 816 39. Alikhan N-F, Petty NK, Ben Zakour NL, Beatson SA. BLAST Ring Image  
817 Generator (BRIG): simple prokaryote genome comparisons. *BMC*  
818 *Genomics.* 2011;12: 402. doi:10.1186/1471-2164-12-402
- 819 40. Crooks GE, Hon G, Chandonia J-M, Brenner SE. WebLogo: a sequence  
820 logo generator. *Genome Res.* 2004;14: 1188–1190. doi:10.1101/gr.849004
- 821 41. Farrugia DN, Elbourne LDH, Mabbutt BC, Paulsen IT. A novel family of  
822 integrases associated with prophages and genomic islands integrated within  
823 the tRNA-dihydrouridine synthase A (*dusA*) gene. *Nucleic Acids Res.*  
824 2015;43: 4547–4557. doi:10.1093/nar/gkv337

- 825 42. Rivard N, Colwell RR, Burrus V. Antibiotic Resistance in *Vibrio cholerae*:  
826 Mechanistic Insights from IncC Plasmid-Mediated Dissemination of a Novel  
827 Family of Genomic Islands Inserted at *trmE*. mSphere. 2020;5: e00748-20.  
828 doi:10.1128/mSphere.00748-20
- 829 43. Roy D, Huguet KT, Grenier F, Burrus V. IncC conjugative plasmids and  
830 SXT/R391 elements repair double-strand breaks caused by CRISPR-Cas  
831 during conjugation. Nucleic Acids Res. 2020;48: 8815–8827.  
832 doi:10.1093/nar/gkaa518
- 833 44. Doublet B, Golding GR, Mulvey MR, Cloeckert A. Secondary Chromosomal  
834 Attachment Site and Tandem Integration of the Mobilizable *Salmonella*  
835 Genomic Island 1. Fairhead C, editor. PLoS ONE. 2008;3: e2060.  
836 doi:10.1371/journal.pone.0002060
- 837 45. Siebor E, Neuwirth C. Proteus genomic island 1 (PGI1), a new resistance  
838 genomic island from two *Proteus mirabilis* French clinical isolates. J  
839 Antimicrob Chemother. 2014;69: 3216–3220. doi:10.1093/jac/dku314
- 840 46. Hochhut B, Waldor MK. Site-specific integration of the conjugal *Vibrio*  
841 *cholerae* SXT element into *prfC*. Mol Microbiol. 1999;32: 99–110.
- 842 47. de Curraize C, Siebor E, Neuwirth C, Hall RM. SGI0, a relative of  
843 *Salmonella* genomic islands SGI1 and SGI2, lacking a class 1 integron,  
844 found in *Proteus mirabilis*. Plasmid. 2019; 102453.  
845 doi:10.1016/j.plasmid.2019.102453
- 846 48. Dower WJ, Miller JF, Ragsdale CW. High efficiency transformation of *E. coli*  
847 by high voltage electroporation. Nucleic Acids Res. 1988;16: 6127–6145.
- 848 49. Demarre G, Guérout A-M, Matsumoto-Mashimo C, Rowe-Magnus DA,  
849 Marlière P, Mazel D. A new family of mobilizable suicide plasmids based on  
850 broad host range R388 plasmid (IncW) and RP4 plasmid (IncPalph)  
851 conjugative machineries and their cognate *Escherichia coli* host strains. Res  
852 Microbiol. 2005;156: 245–255. doi:10.1016/j.resmic.2004.09.007
- 853 50. Datsenko KA, Wanner BL. One-step inactivation of chromosomal genes in  
854 *Escherichia coli* K-12 using PCR products. Proc Natl Acad Sci U S A.  
855 2000;97: 6640–6645.
- 856 51. Datta S, Costantino N, Court DL. A set of recombineering plasmids for  
857 gram-negative bacteria. Gene. 2006;379: 109–115.  
858 doi:10.1016/j.gene.2006.04.018
- 859 52. Cherepanov PP, Wackernagel W. Gene disruption in *Escherichia coli*: TcR  
860 and KmR cassettes with the option of Flp-catalyzed excision of the  
861 antibiotic-resistance determinant. Gene. 1995;158: 9–14. doi:10.1016/0378-  
862 1119(95)00193-a

- 863 53. Haldimann A, Wanner BL. Conditional-replication, integration, excision, and  
864 retrieval plasmid-host systems for gene structure-function studies of  
865 bacteria. *J Bacteriol.* 2001;183: 6384–6393. doi:10.1128/JB.183.21.6384-  
866 6393.2001
- 867 54. Senanayake SD, Brian DA. Precise large deletions by the PCR-based  
868 overlap extension method. *Mol Biotechnol.* 1995;4: 13.  
869 doi:10.1007/BF02907467
- 870 55. Hellemans J, Mortier G, De Paepe A, Speleman F, Vandesompele J. qBase  
871 relative quantification framework and software for management and  
872 automated analysis of real-time quantitative PCR data. *Genome Biology.*  
873 2007;8: R19. doi:10.1186/gb-2007-8-2-r19
- 874 56. Huang Y, Niu B, Gao Y, Fu L, Li W. CD-HIT Suite: a web server for  
875 clustering and comparing biological sequences. *Bioinformatics.* 2010;26:  
876 680–682. doi:10.1093/bioinformatics/btq003
- 877 57. Kumar S, Stecher G, Li M, Knyaz C, Tamura K. MEGA X: Molecular  
878 Evolutionary Genetics Analysis across Computing Platforms. *Mol Biol Evol.*  
879 2018;35: 1547–1549. doi:10.1093/molbev/msy096
- 880 58. Jones DT, Taylor WR, Thornton JM. The rapid generation of mutation data  
881 matrices from protein sequences. *Bioinformatics.* 1992;8: 275–282.  
882 doi:10.1093/bioinformatics/8.3.275
- 883 59. Whelan S, Goldman N. A General Empirical Model of Protein Evolution  
884 Derived from Multiple Protein Families Using a Maximum-Likelihood  
885 Approach. *Mol Biol Evol.* 2001;18: 691–699.  
886 doi:10.1093/oxfordjournals.molbev.a003851
- 887 60. Le SQ, Gascuel O. An Improved General Amino Acid Replacement Matrix.  
888 *Mol Biol Evol.* 2008;25: 1307–1320. doi:10.1093/molbev/msn067
- 889 61. Edgar RC. MUSCLE: multiple sequence alignment with high accuracy and  
890 high throughput. *Nucleic Acids Res.* 2004;32: 1792–1797.  
891 doi:10.1093/nar/gkh340
- 892 62. Capella-Gutiérrez S, Silla-Martínez JM, Gabaldón T. trimAl: a tool for  
893 automated alignment trimming in large-scale phylogenetic analyses.  
894 *Bioinformatics.* 2009;25: 1972–1973. doi:10.1093/bioinformatics/btp348
- 895 63. Huson DH, Bryant D. Application of Phylogenetic Networks in Evolutionary  
896 Studies. *Molecular Biology and Evolution.* 2006;23: 254–267.  
897 doi:10.1093/molbev/msj030

- 898 64. Lorenz R, Bernhart SH, Höner zu Siederdisen C, Tafer H, Flamm C,  
899 Stadler PF, et al. ViennaRNA Package 2.0. *Algorithms Mol Biol*. 2011;6: 26.  
900 doi:10.1186/1748-7188-6-26
- 901 65. Kirchberger PC, Orata FD, Nasreen T, Kauffman KM, Tarr CL, Case RJ, et  
902 al. Culture-independent tracking of *Vibrio cholerae* lineages reveals complex  
903 spatiotemporal dynamics in a natural population. *Environmental*  
904 *Microbiology*. 2020 [cited 21 Sep 2020]. doi:10.1111/1462-2920.14921
- 905 66. Heidelberg JF, Eisen JA, Nelson WC, Clayton RA, Gwinn ML, Dodson RJ,  
906 et al. DNA sequence of both chromosomes of the cholera pathogen *Vibrio*  
907 *cholerae*. *Nature*. 2000;406: 477–483. doi:10.1038/35020000
- 908 67. Singer M, Baker TA, Schnitzler G, Deischel SM, Goel M, Dove W, et al. A  
909 collection of strains containing genetically linked alternating antibiotic  
910 resistance elements for genetic mapping of *Escherichia coli*. *Microbiol Rev*.  
911 1989;53: 1–24.
- 912 68. Ceccarelli D, Daccord A, René M, Burrus V. Identification of the Origin of  
913 Transfer (*oriT*) and a New Gene Required for Mobilization of the SXT/R391  
914 Family of Integrating Conjugative Elements. *J Bacteriol*. 2008;190: 5328–  
915 5338. doi:10.1128/JB.00150-08
- 916 69. Carraro N, Sauvé M, Matteau D, Lauzon G, Rodrigue S, Burrus V.  
917 Development of pVCR94ΔX from *Vibrio cholerae*, a prototype for studying  
918 multidrug resistant IncA/C conjugative plasmids. *Front Microbiol*. 2014;5: 44.  
919 doi:10.3389/fmicb.2014.00044
- 920 70. Grenier F, Matteau D, Baby V, Rodrigue S. Complete genome sequence of  
921 *Escherichia coli* BW25113. *Genome Announc*. 2014;2: pii: e01038-14.  
922 doi:10.1128/genomeA.01038-14
- 923 71. Garriss G, Waldor MK, Burrus V. Mobile antibiotic resistance encoding  
924 elements promote their own diversity. *PLoS Genet*. 2009;5: e1000775.  
925 doi:10.1371/journal.pgen.1000775
- 926 72. Guzman LM, Belin D, Carson MJ, Beckwith J. Tight regulation, modulation,  
927 and high-level expression by vectors containing the arabinose  $P_{BAD}$   
928 promoter. *J Bacteriol*. 1995;177: 4121–4130.
- 929 73. Bailey TL, Boden M, Buske FA, Frith M, Grant CE, Clementi L, et al. MEME  
930 SUITE: tools for motif discovery and searching. *Nucleic Acids Res*. 2009;37:  
931 W202-208. doi:10.1093/nar/gkp335

933 **Table 1. Strains and elements used in this study.**

| Strains or elements                            | Relevant genotype or phenotype <sup>a</sup>                                                                                                                                                                                        | Source or reference     |
|------------------------------------------------|------------------------------------------------------------------------------------------------------------------------------------------------------------------------------------------------------------------------------------|-------------------------|
| <i>V. cholerae</i>                             |                                                                                                                                                                                                                                    |                         |
| OY6PG08                                        | Environmental, Oyster Pond, MA, USA, August 2009                                                                                                                                                                                   | [65]                    |
| N16961                                         | O1 El Tor                                                                                                                                                                                                                          | [66]                    |
| <i>E. coli</i>                                 |                                                                                                                                                                                                                                    |                         |
| β2163                                          | (F <sup>-</sup> ) RP4-2-Tc::Mu Δ <i>dapA</i> ::( <i>erm-pir</i> ) (Kn Em)                                                                                                                                                          | [49]                    |
| CAG18439                                       | MG1655 <i>lacZU118 lacI42</i> ::Tn10 (Tc)                                                                                                                                                                                          | [67]                    |
| BW25113                                        | F <sup>-</sup> Δ( <i>araD-araB</i> )567, Δ <i>lacZ4787</i> ::( <i>rrnB-3</i> ), λ <sup>-</sup> , <i>rph-1</i> , Δ( <i>rhaD-rhaB</i> )568, <i>hsdR514</i>                                                                           | [50]                    |
| EC100                                          | F <sup>-</sup> <i>mcrA</i> Δ( <i>mrr-hsdRMS-mcrBC</i> ) Φ80 <i>lacZΔM15</i> Δ <i>lacX74</i> <i>recA1 endA1 araD139</i> Δ( <i>ara, leu</i> )7697 <i>galU galK</i> λ <sup>-</sup> <i>rpsL</i> ( <i>Sm</i> <sup>R</sup> ) <i>nupG</i> | Epicentre, Madison Wis. |
| KH40                                           | MG1655 Δ <i>dapA</i> :: <i>cat</i> (Cm)                                                                                                                                                                                            | This study              |
| VB112                                          | Rf-derivative of MG1655                                                                                                                                                                                                            | [68]                    |
| GG56                                           | Nx-derivative of BW25113                                                                                                                                                                                                           | [69,70]                 |
| FD034                                          | CAG18439 Δ <i>lacZ dusA</i> '-' <i>lacZ-aad7</i> (Tc Sp)                                                                                                                                                                           | This study              |
| FD036                                          | GG56 <i>dusA</i> '-' <i>lacZ-aad7</i> (Nx Sp)                                                                                                                                                                                      | This study              |
| Plasmids                                       |                                                                                                                                                                                                                                    |                         |
| pKD3                                           | Cm <sup>R</sup> PCR template for one-step chromosomal gene inactivation (Cm)                                                                                                                                                       | [50]                    |
| pKD4                                           | Kn <sup>R</sup> PCR template for one-step chromosomal gene inactivation (Kn)                                                                                                                                                       | [50]                    |
| pKD13                                          | Kn <sup>R</sup> PCR template for one-step chromosomal gene inactivation (Kn)                                                                                                                                                       | [50]                    |
| pVI36                                          | Sp <sup>R</sup> PCR template for one-step chromosomal gene inactivation (Sp)                                                                                                                                                       | [68]                    |
| pVI42B                                         | pVI36 BamHI::P <sub>lac</sub> - <i>lacZ</i> (Sp)                                                                                                                                                                                   | [71]                    |
| pSW23T                                         | pSW23::oriT <sub>RP4</sub> ; oriV <sub>R6Kv</sub> (Cm)                                                                                                                                                                             | [49]                    |
| pOP <i>lacZ</i>                                | pAH56 <i>lacZ</i> (Kn)                                                                                                                                                                                                             | [19]                    |
| pBAD30                                         | ori <sub>p15A</sub> <i>bla araC</i> P <sub>BAD</sub> (Ap)                                                                                                                                                                          | [72]                    |
| pBAD- <i>acaDC</i>                             | pBAD30:: <i>acaDC</i> (Ap)                                                                                                                                                                                                         | [19]                    |
| pBAD- <i>rdfN</i>                              | pBAD30:: <i>rdfN</i> (Ap)                                                                                                                                                                                                          | This study              |
| pVCR94 <sup>Kn</sup> Δ <i>acr2</i>             | Δ <i>acr2</i> mutant of pVCR94 <sup>Kn</sup> (Su Kn)                                                                                                                                                                               | [43]                    |
| pVCR94 <sup>Sp</sup>                           | Sp <sup>R</sup> derivative of pVCR94 (Su Sp)                                                                                                                                                                                       | [19]                    |
| pVCR94 <sup>Sp</sup> Δ <i>acaC</i>             | Δ <i>acaC</i> mutant of pVCR94 <sup>Sp</sup> (Su Sp)                                                                                                                                                                               | [19]                    |
| pVCR94 <sup>Sp</sup> Δ <i>acaDC</i>            | Δ <i>acaDC</i> mutant of pVCR94 <sup>Sp</sup> (Su Sp)                                                                                                                                                                              | [19]                    |
| Genomic Islands                                |                                                                                                                                                                                                                                    |                         |
| MGIV <i>chUSA3</i>                             |                                                                                                                                                                                                                                    | This study              |
| MGIV <i>chUSA3</i> <sup>Cm</sup>               | MGIV <i>chUSA3</i> CGT85_RS05425ΩpSW23T (Cm)                                                                                                                                                                                       | This study              |
| MGIV <i>chUSA3</i> <sup>Kn</sup>               | Kn <sup>R</sup> derivative of MGIV <i>chUSA3</i> (Kn)                                                                                                                                                                              | This study              |
| MGIV <i>chUSA3</i> <sup>Kn</sup> Δ <i>sgaC</i> | Δ <i>sgaC</i> mutant of MGIV <i>chUSA3</i> (Kn)                                                                                                                                                                                    | This study              |
| MGIV <i>chUSA3</i> <sup>Kn</sup> Δ <i>rdfN</i> | Δ <i>rdfN</i> mutant of MGIV <i>chUSA3</i> (Kn)                                                                                                                                                                                    | This study              |
| mini-GI                                        | <i>attP-int-aad7</i> derived from MGIV <i>chUSA3</i> (Sp)                                                                                                                                                                          | This study              |

934 <sup>a</sup>Ap, ampicillin; Cm, chloramphenicol; Em, erythromycin, Kn, kanamycin; Nx, Nalidixic

935 acid; Rf, rifampin; Sm, streptomycin; Sp, spectinomycin; Su, sulfamethoxazole; Tc,

936 tetracycline; Tm, trimethoprim; ts, thermosensitive.



938 **Table 2. Oligonucleotides used in this study.**

| Primer name        | Nucleotide sequence (5' to 3')                                  | Reference  |
|--------------------|-----------------------------------------------------------------|------------|
| dusAigEcoRIF       | NNNNGAATTCACAAGTTATCGCTCTATCACTG                                | This study |
| dusAigEcoRIR       | NNNNGAATTCCTTTTGGATGTGGGGCATG                                   | This study |
| VchdusAattLf       | CAGCCGACGTTGAGGTTAA                                             | This study |
| EcodusAattLf       | CAGCCGACATTCAGGTTG                                              | This study |
| dusAattLr          | AAGCGAATGATGCCTTTACTG                                           | This study |
| dusAattRf          | GTGTGTGTAGCTTCAGGTG                                             | This study |
| EcodusAattRr       | GTCGAACCTGGATTGTTTATCATTG                                       | This study |
| VchdusAattRr       | TCACCATCACTGTTGGACTT                                            | This study |
| dusAscarNoFRTf     | CAGCAGTCCTATCATGCCCCACATCAAAGGGAATTCAGAGCGCTTTTGAAG<br>CTCA     | This study |
| dusAscarNoFRTTr    | GATCATAATCAATATCGATGGAGAAAAGCAATGACATCGGAATAGGAACTT<br>CAAGA    | This study |
| DelprtNf           | ATCGTTGGAAATTTGTTGAGAATGATTGAGGATAGCTGTGTAGGCTGGAGCT<br>GCTTCG  | This study |
| DelprtNr           | GGGATGGGATAATATTTGGCATTTCAGACCCAGGTAGTTAATTCGGGGATC<br>CGTCGACC | This study |
| FwDeltaDapA-MG1655 | ATGTTTCACGGGAAGTATTGTCGCGATTGTTACTCCGGTGTAGGCTGGAGCT<br>GCTTCG  | This study |
| RvDeltaDapA-MG1655 | TTACAGCAAACCGGCATGCTTAAGCGCCGCTCTGACCATATGAATATCCTC<br>CTTA     | This study |
| lacZW-B            | GCGAAATACGGGCAGACATGGCCTGCCCGGTTATTACATATGAATATCCTC<br>CTTA     | This study |
| lacZW-F            | TTGTGAGCGGATAACAATTTTACACAGGAAAACAGCTGTGTAGGCTGGAGCT<br>GCTTCG  | This study |
| oDF15              | AGCGTTGCACCAATGCTCGACTGGACGGACAGACATCTGGCCGTCGTTTTA<br>CAACGTCG | This study |
| oDF16              | AGGGCGTGGTGAATTTGACTACTTTTTGGTGAAAAGGCAGCATTACACGTC<br>TTGAG    | This study |
| oFD26f             | GCAGAACGGGCATTCGACACAAGTTTCGCTGATTAACGTGTAGGCTGGAGCT<br>GCTTC   | This study |
| oFD26r             | CCAGGTCTTTGGCCGAAAAATGAGGATGAGTAGTCCATATGAATATCCTC<br>CTTA      | This study |
| oFD1r              | NNNNCTCGAGCACATGATTTCCGGAAATAAAAAGC                             | This study |
| oFD1f              | NNCTGCAGTTAATCAGCGAACTTGTGTGCAAT                                | This study |
| oFD3r              | NNNNCTCGAGAGACAAATACTCCCAGACTTGATCC                             | This study |
| oFD4r              | NNNNCTCGAGAGCTATCCTCAATCATTCTCAACA                              | This study |
| oFD4f              | NNCTGCAGTAAAAACATTTGAGAGGTCATTCGG                               | This study |
| oFD5r              | NNNNCTCGAGAGACACCTCCAAAAAGTTGAAGG                               | This study |
| oFD5f              | NNCTGCAGGCAGCTTATAGCATGAATCTGTAC                                | This study |
| oFD6r              | NNNNCTCGAGGAAGCGAATGATGCCTTTACTGG                               | This study |
| oFD6f              | NNCTGCAGCGCTGAATCTACGACTTAATGACA                                | This study |
| prtNEcoRif         | NNNGAATTC AAGGAGGAATAATAAATGAATACCGCATTTTCTTCTG                 | This study |
| prtNHindIIIrev     | NNNAAGCTTCAGGTAGTTACAGTTCTCTC                                   | This study |
| oVB10              | CAGGTGGCACTTTTCGGGGTCAGTCTTTCCCAACACTCATCCCTTCTG                | This study |
| oVB11              | GAGTGTGGGAAAGACTGACCCCGAAAAGTGCCACCTGCATCGATG                   | This study |
| oVB12              | NNNGAGCTCCGGGCGAGAAGTAGCGTTGA                                   | This study |
| oVB13              | NNNGAGCTCGATAGCTAGACTGGGCGGT                                    | This study |
| attBdusAqPCRfwd    | CCTGAATAGTGATGCTGAATAAC                                         | This study |
| attBdusAqPCRrev    | CCATTTCCGGTATACAGCAAC                                           | This study |
| higAqPCRfwd        | CTTCCTGCTCAAAGACTCTATG                                          | This study |
| higAqPCRrev        | CTGGTGACCGAGTTTCTG                                              | This study |
| qFwpVCR            | AAGAGAACCAAAGACAAAGACC                                          | [26]       |
| qRvpVCR            | CACCTTCACCGTGAAATGC                                             | [26]       |

|         |                        |      |
|---------|------------------------|------|
| qdnaBFw | ACGATTTTTACACCCGCCAC   | [26] |
| qdnaBRv | ATCATCTCACGGACAACGGCAC | [26] |
| qhicBFw | GCTTATCCCTTTACCTTCGCC  | [26] |
| qhicBRv | TAACTCTTTGCCAAGCGCC    | [26] |
| qthdFFw | GATAATGACACTATCGTAGCCC | [26] |
| qthdFRv | GCAGTTCCAGCACATCTTC    | [26] |

---

939

## 940 **Supporting information**

941 **S1 Figure. NeighborNet phylogenetic network and predicted secondary structure of**  
942 **39 *oriT* loci of SGI1-like islands.** Each island's integration site and type are annotated.  
943 The sequence of canonical SGI1 was used as a reference to describe the predicted  
944 secondary structure of all *oriT* sequences. Pairs can be perfectly conserved, imperfectly  
945 conserved (1/39 not conserved), not conserved (> 1/39) or can be either an A-T or G-C  
946 pair only. In this last case, the sequence is not conserved, but the predicted local  
947 secondary structure is. "Not conserved" means that in some instances it will correspond  
948 to an A-T/G-C pair, which will either tighten a stem, form a bubble or widen an existing  
949 bubble.

950 **S2 Figure. Maximum likelihood phylogenetic analysis of key proteins of SGI1-**  
951 **related GIs.** The trees for MpsA (A), TraG (B), SgaC (C) and TraN (D) proteins are  
952 drawn to scale, with branch lengths measured in the number of substitutions per site  
953 over 321, 1,145, 188, and 968 amino acid positions, respectively. Bootstrap supports  
954 are indicated as percentages at the branching points only when > 80%. For clarity, the  
955 lengths of the branches linking the two groups in panels A and C were artificially divided  
956 by 8 and 4, respectively. Taxa corresponding to SGI1<sub>trmE</sub> islands and SGI1<sub>yicC</sub> islands  
957 are accompanied by a light blue circle and a red circle, respectively. All other taxa  
958 correspond to SGI1<sub>dusA</sub> islands.

959 **S3 Figure. Alignment of AcaCD-responsive promoters predicted in GIs targeting**  
960 ***dusA*, *yicC* and *trmE*.** Promoter sequences are grouped according to the function of  
961 the expressed genes as follows: (A) recombination directionality factors; (B) mating pair  
962 stabilization; (C) mating pair formation and stabilization; (D) unknown. AcaCD binding

963 sites are shown in green. Logo sequences and *p*-values were generated by MAST [73].

964 When known, the transcription start sites are shown in blue based on previously

965 published works [19,28]. Predicted Shine-Dalgarno sequences are shown in pink. The

966 initiation start codon is shown in bold letters.

967 **S1 Table. Features of the identified GIs and associated strains.**

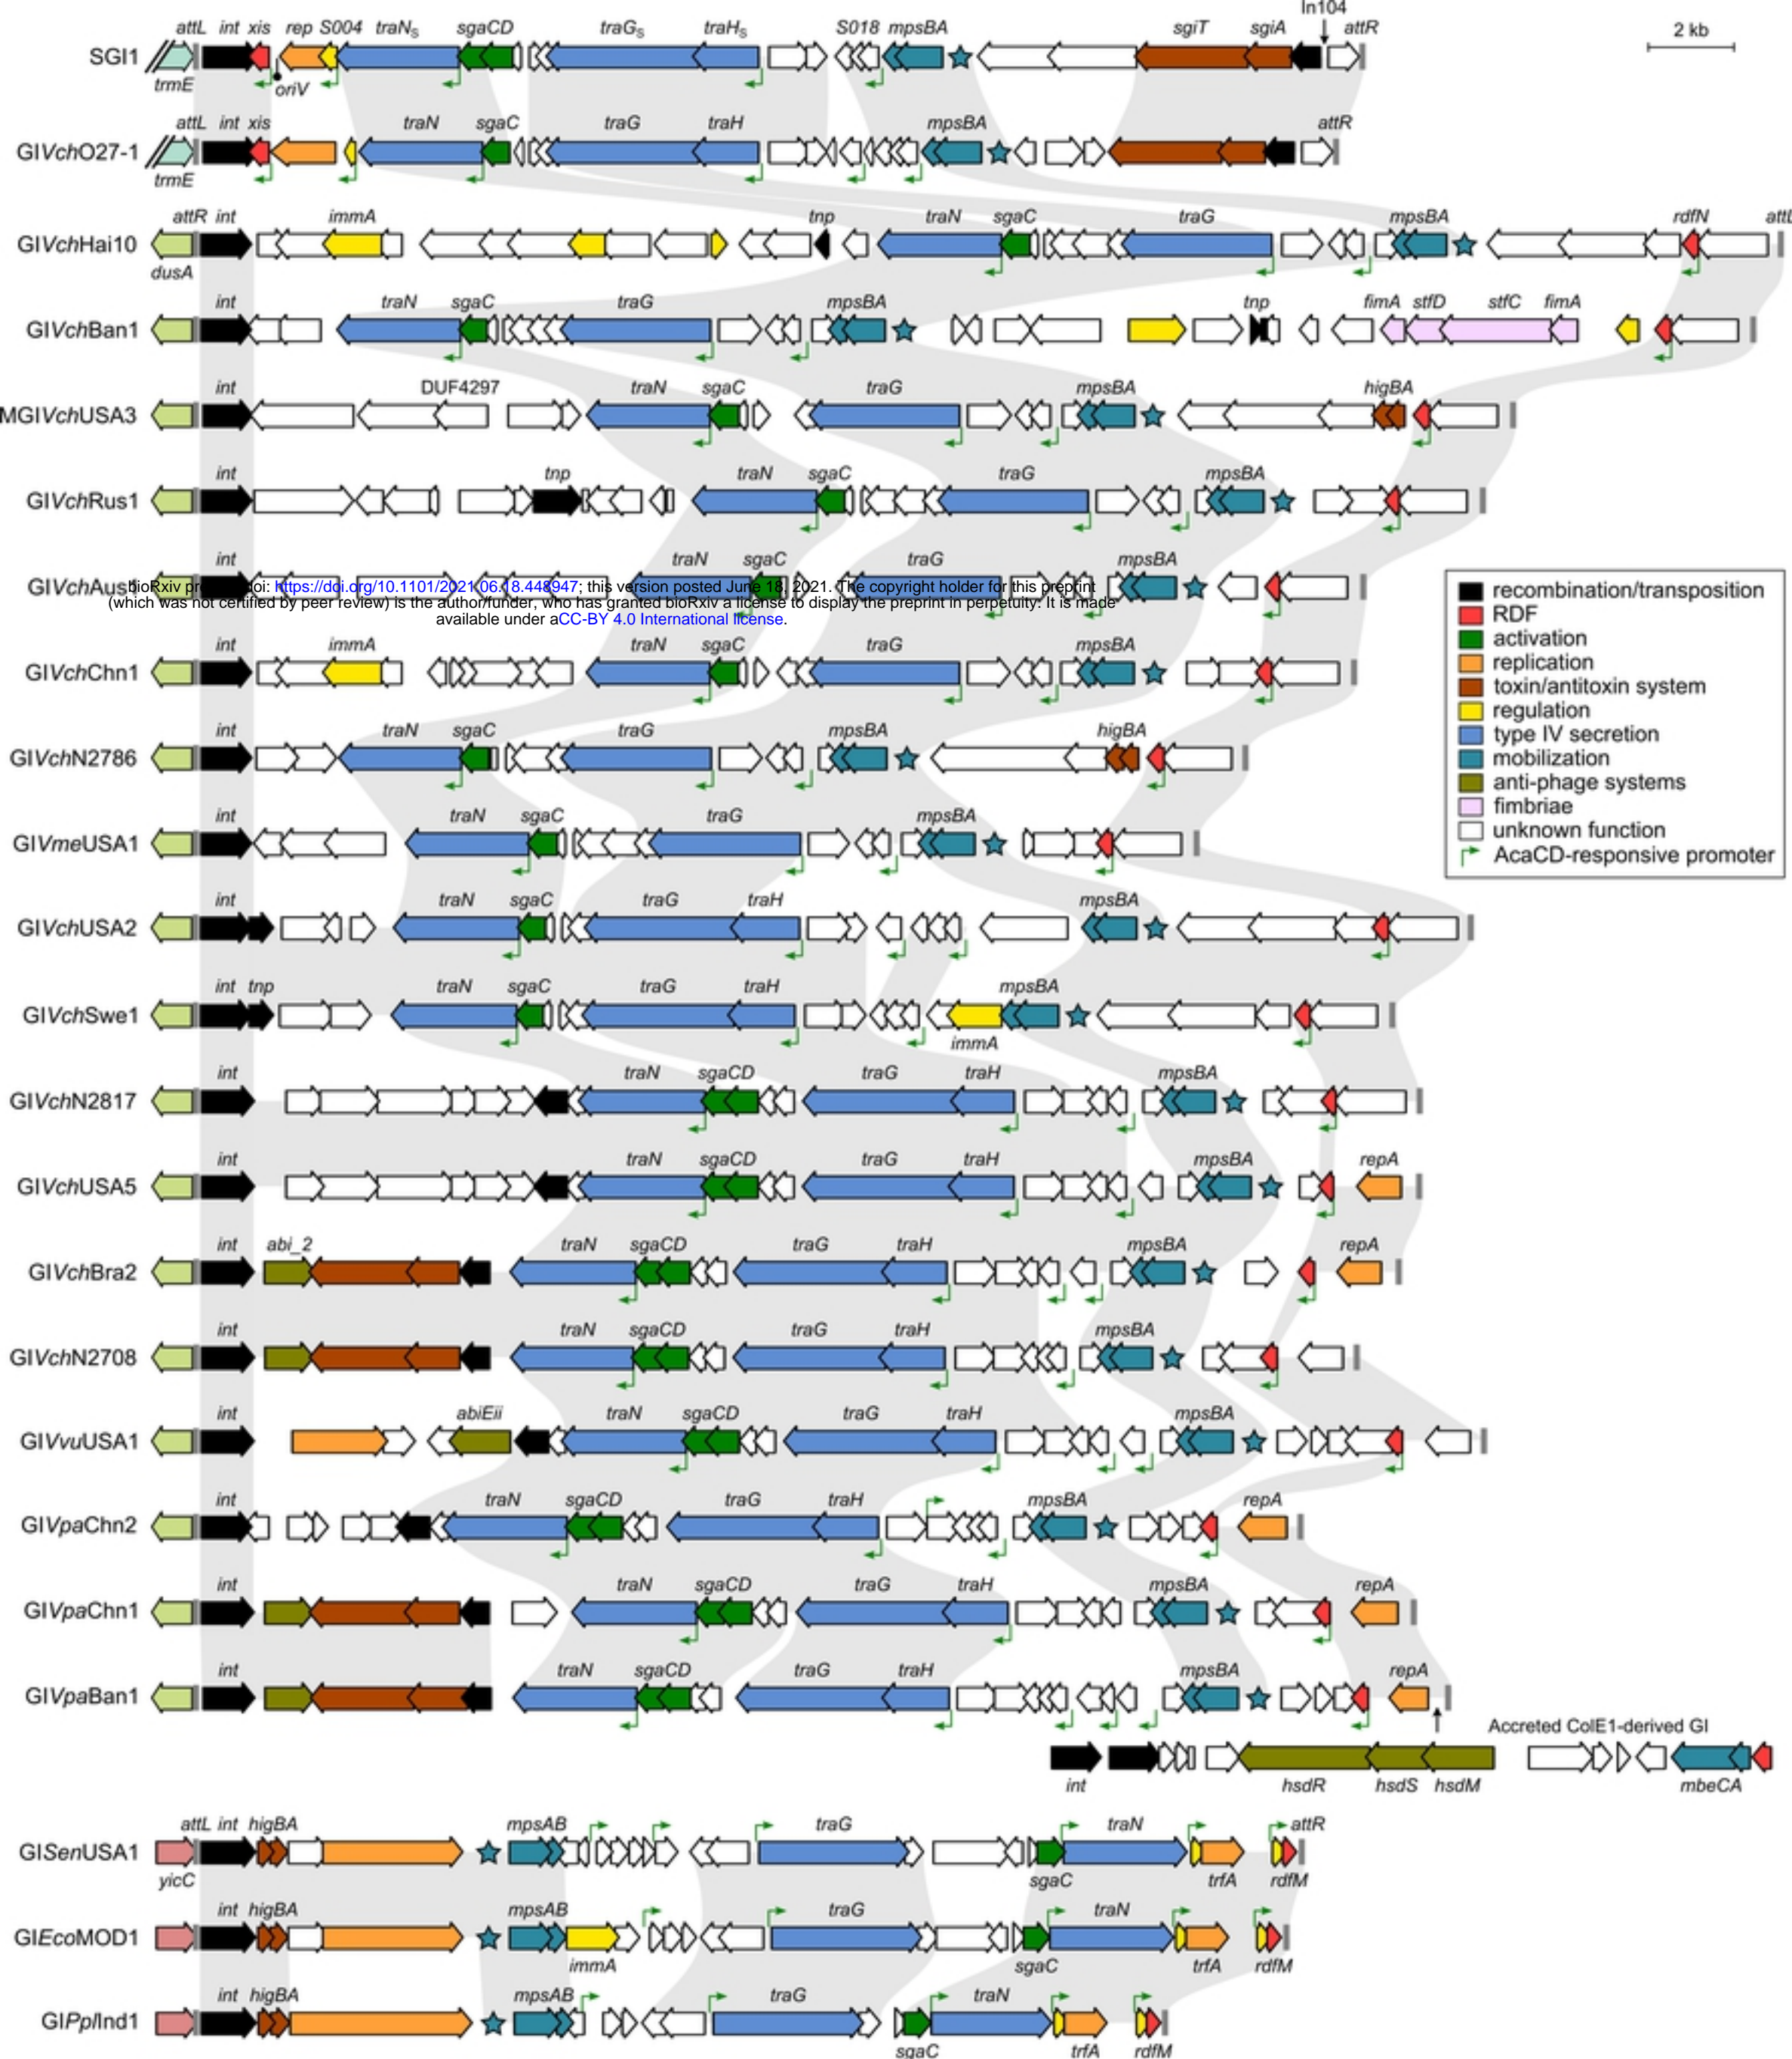

Fig 1

A

B

bioRxiv preprint doi: <https://doi.org/10.1101/2021.06.18.448947>; this version posted June 18, 2021. The copyright holder for this preprint (which was not certified by peer review) is the author/funder, who has granted bioRxiv a license to display the preprint in perpetuity. It is made available under aCC-BY 4.0 International license.

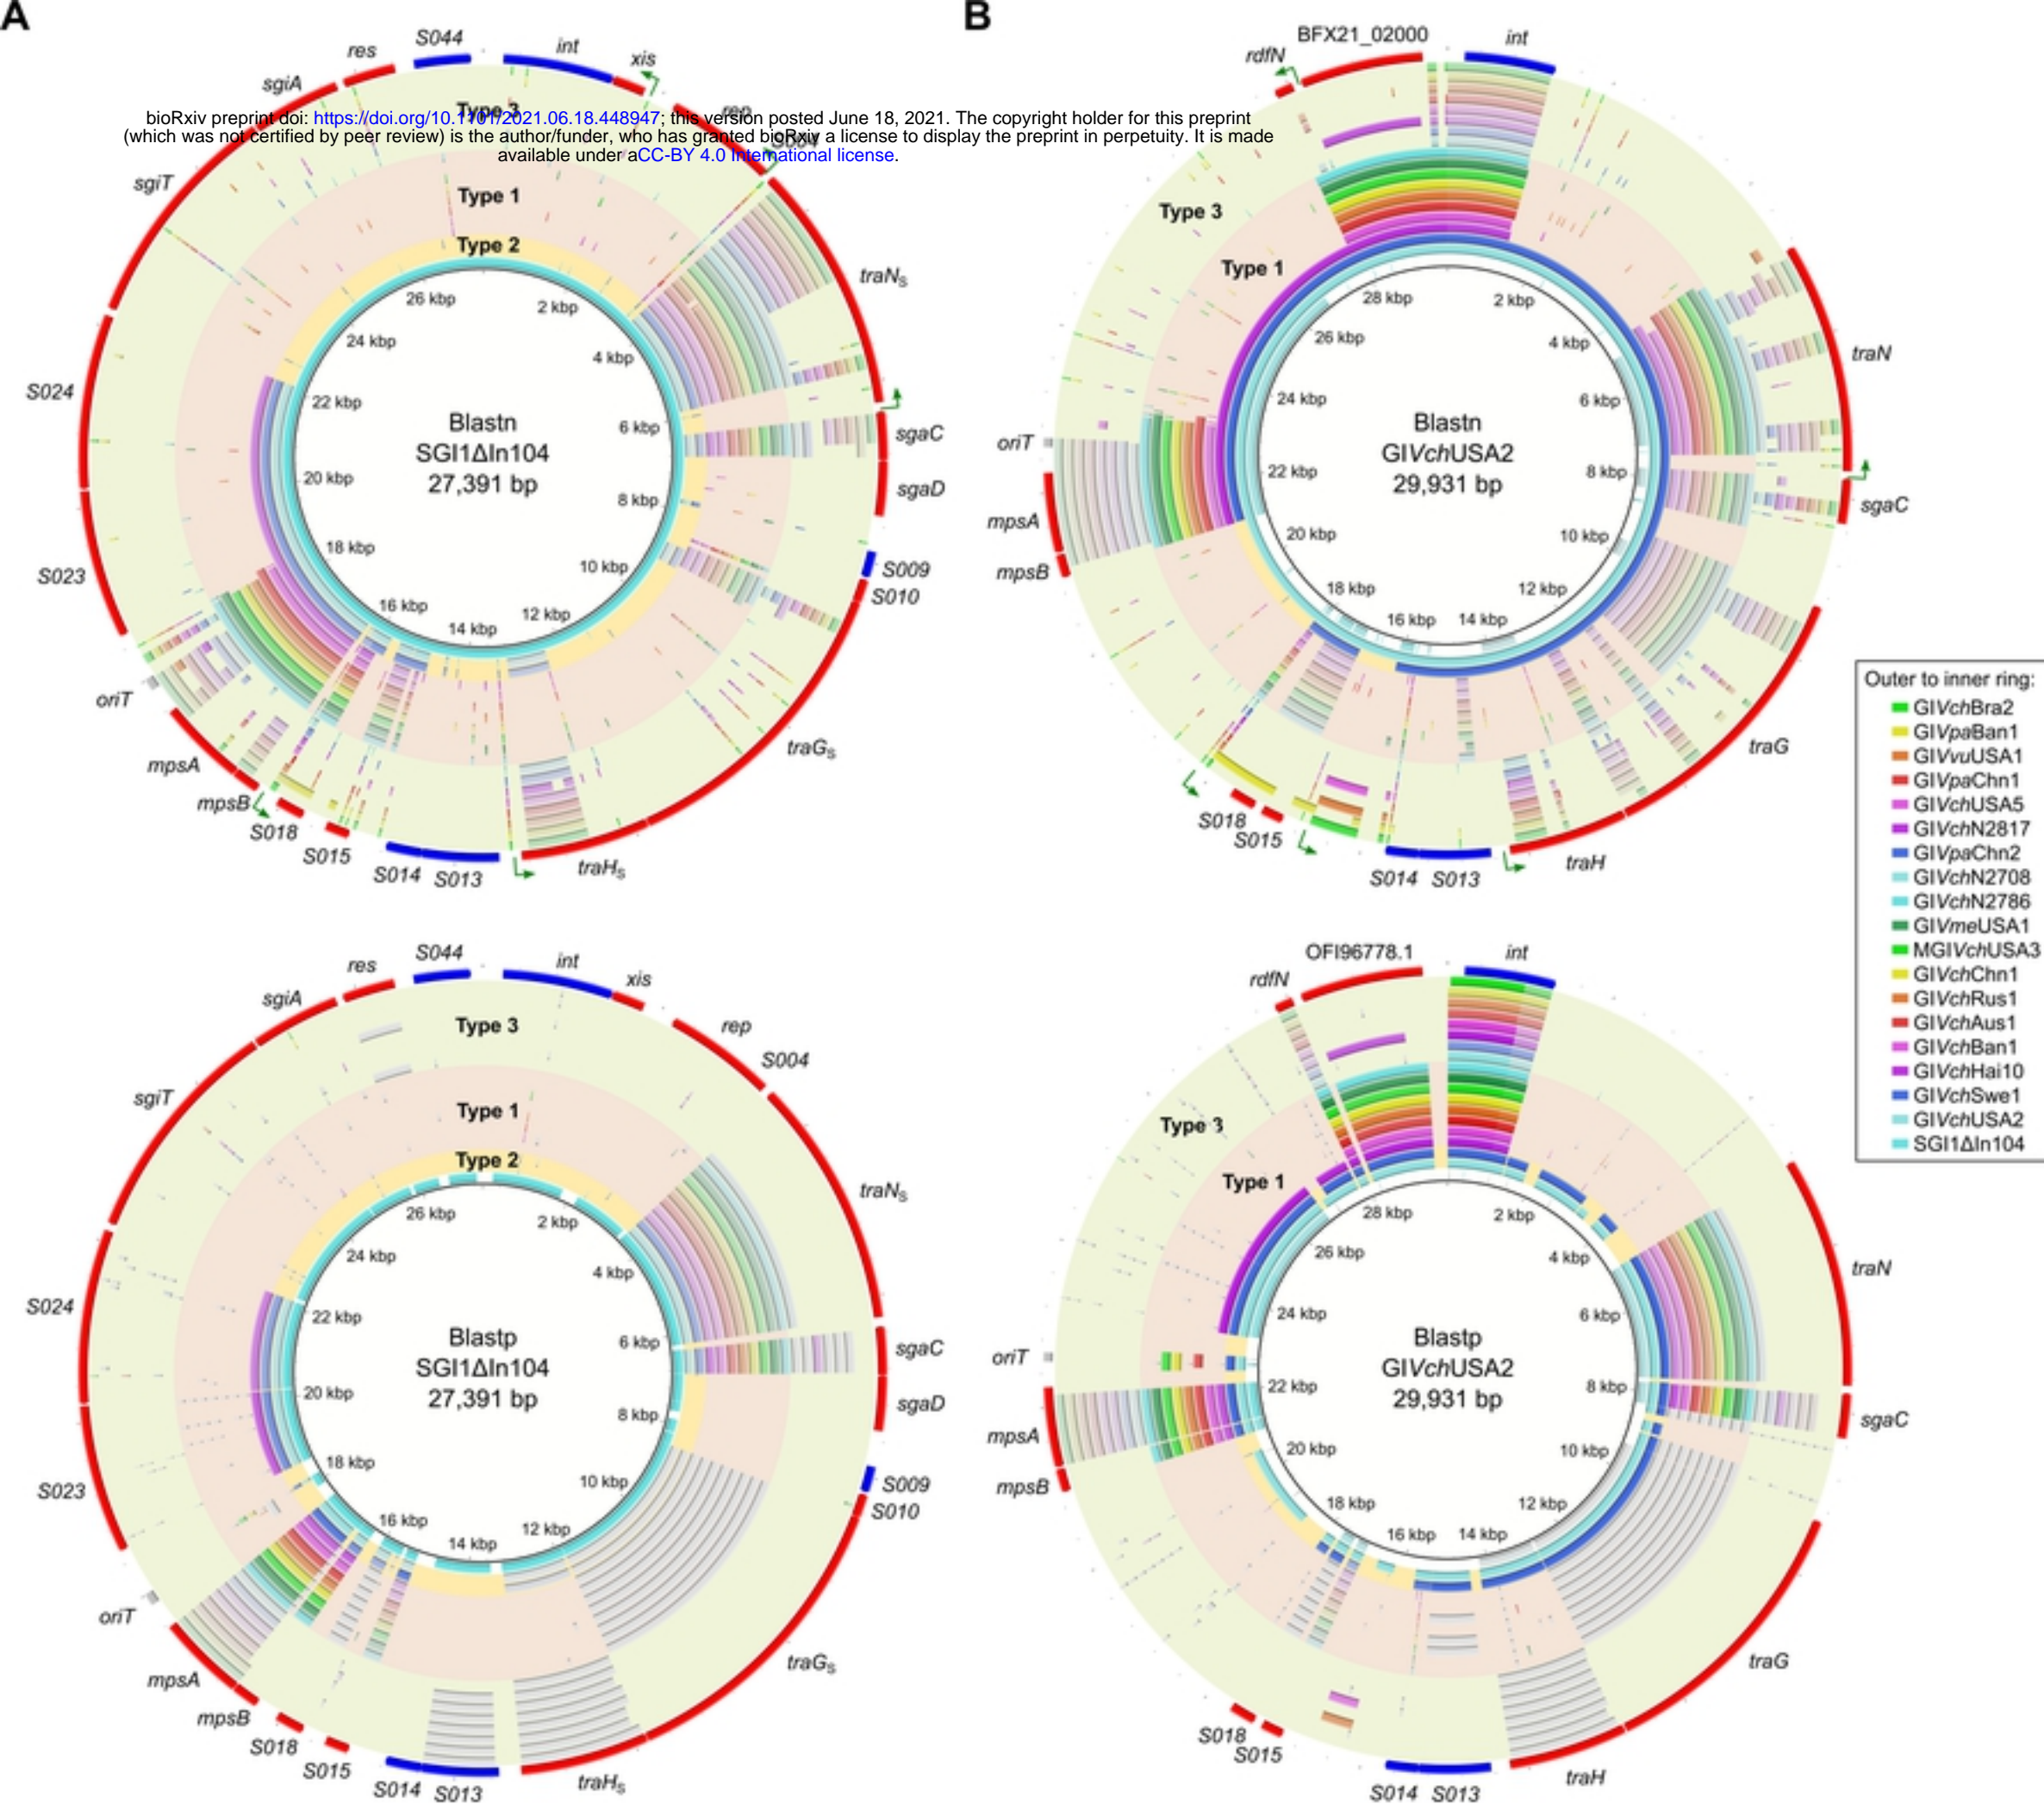

Fig 2

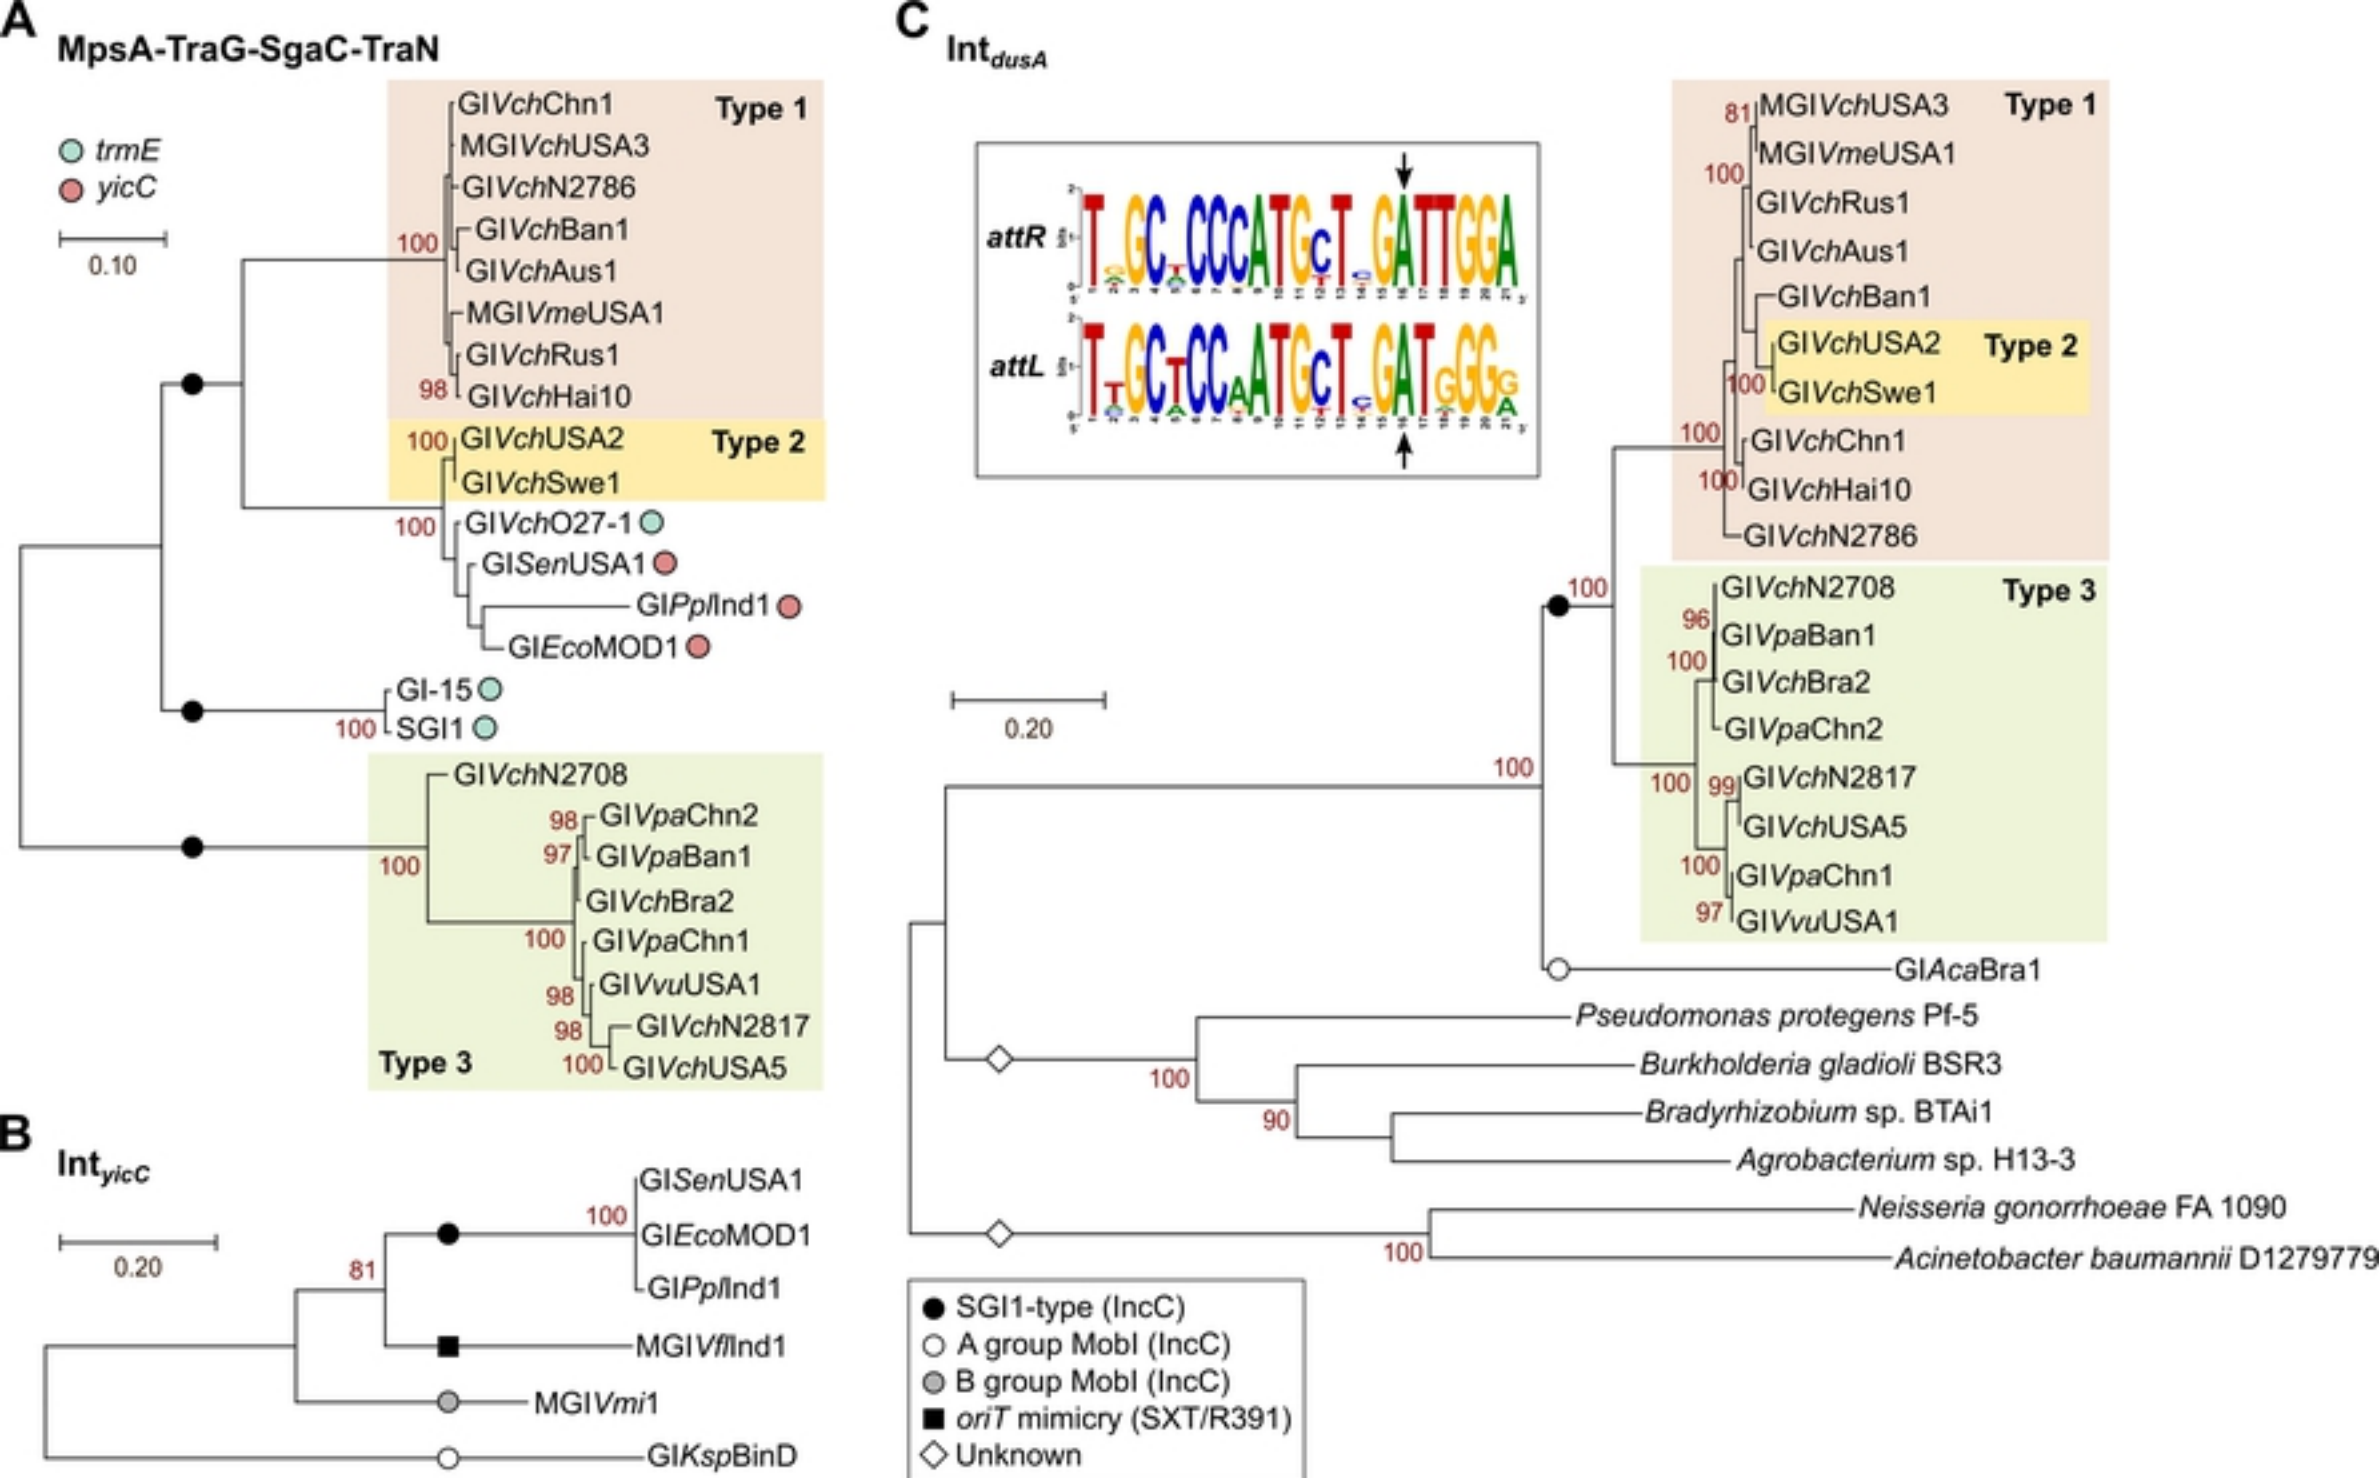

Fig 3

**A**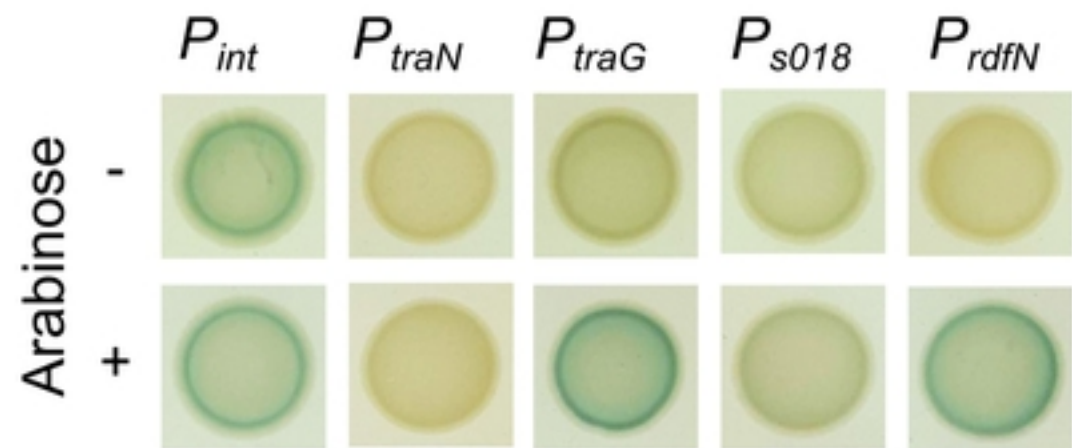**B**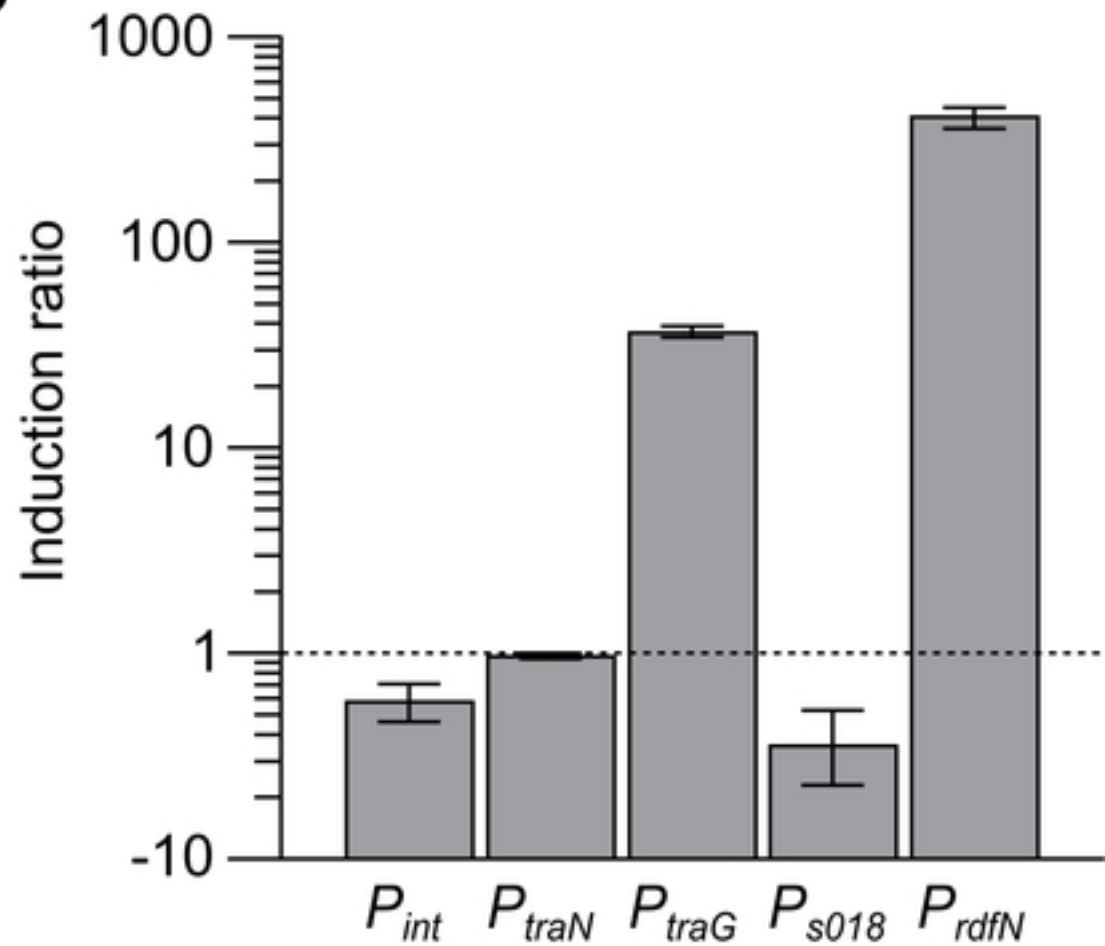

Fig 4



**A***E. coli* K12 *dusA* *attB* site

TAATCTCTACATTTGAAA **ATG** CAC GGT AAT TCT GAA ATG CAA AAA ATC AAC CAA ACC AGC GCA ATG CCT GAA  
 M H G N S E M Q K I N Q T S A M P E  
 AAA ACT GAC GTT CAC TGG AGT GGT CGG TTT AGC **GTT GCA CCA ATG CTC GAC TGG ACG** GAC AGA CAT  
 K T D V H W S G R F S V A P M L D W T D R H

*E. coli* K12 *dusA::MGIVchUSA3<sup>Kn</sup>* *attR* junction

AGTTGAGATTAGTTAAGA **ATG** AGC CAG AAA CAG AAT ACA GAT AAA TCT TTG CAA GAC AGT GAG TTA TCT AGT  
 M S Q K Q N T D K S L Q D S E L S S  
 AAT ATT GAT GTG TCA TTA AGT CGT AGA TTC AGC **GTG GCC CCC ATG CTT GAC TGG ACG** GAC AGA CAT  
 N I D V S L S R R F S V A P M L D W T D R H

**B**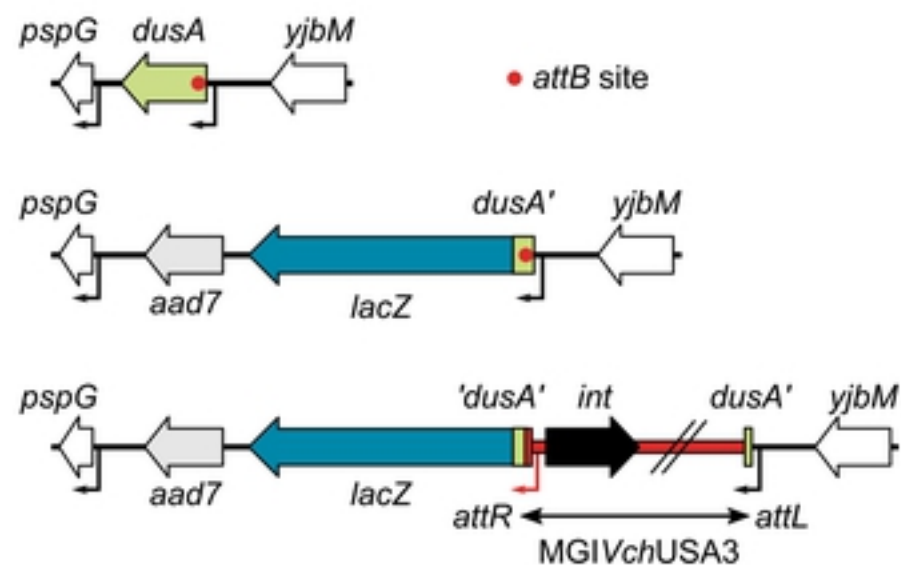**C**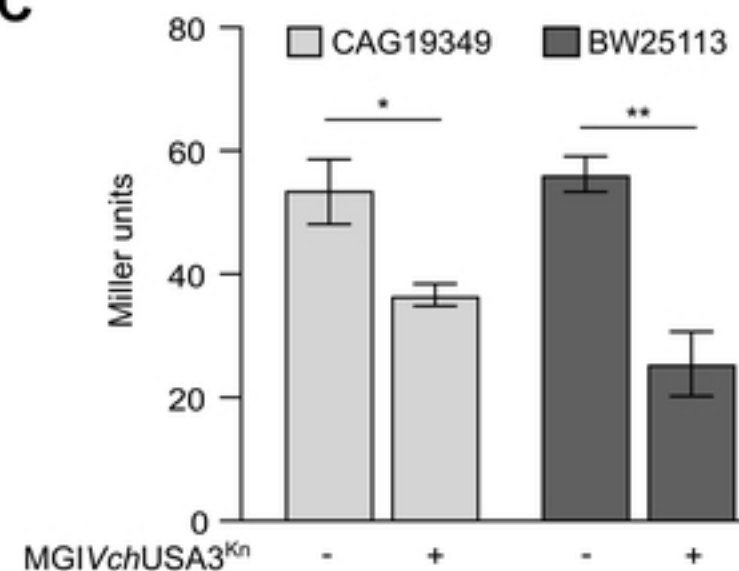

Fig 7

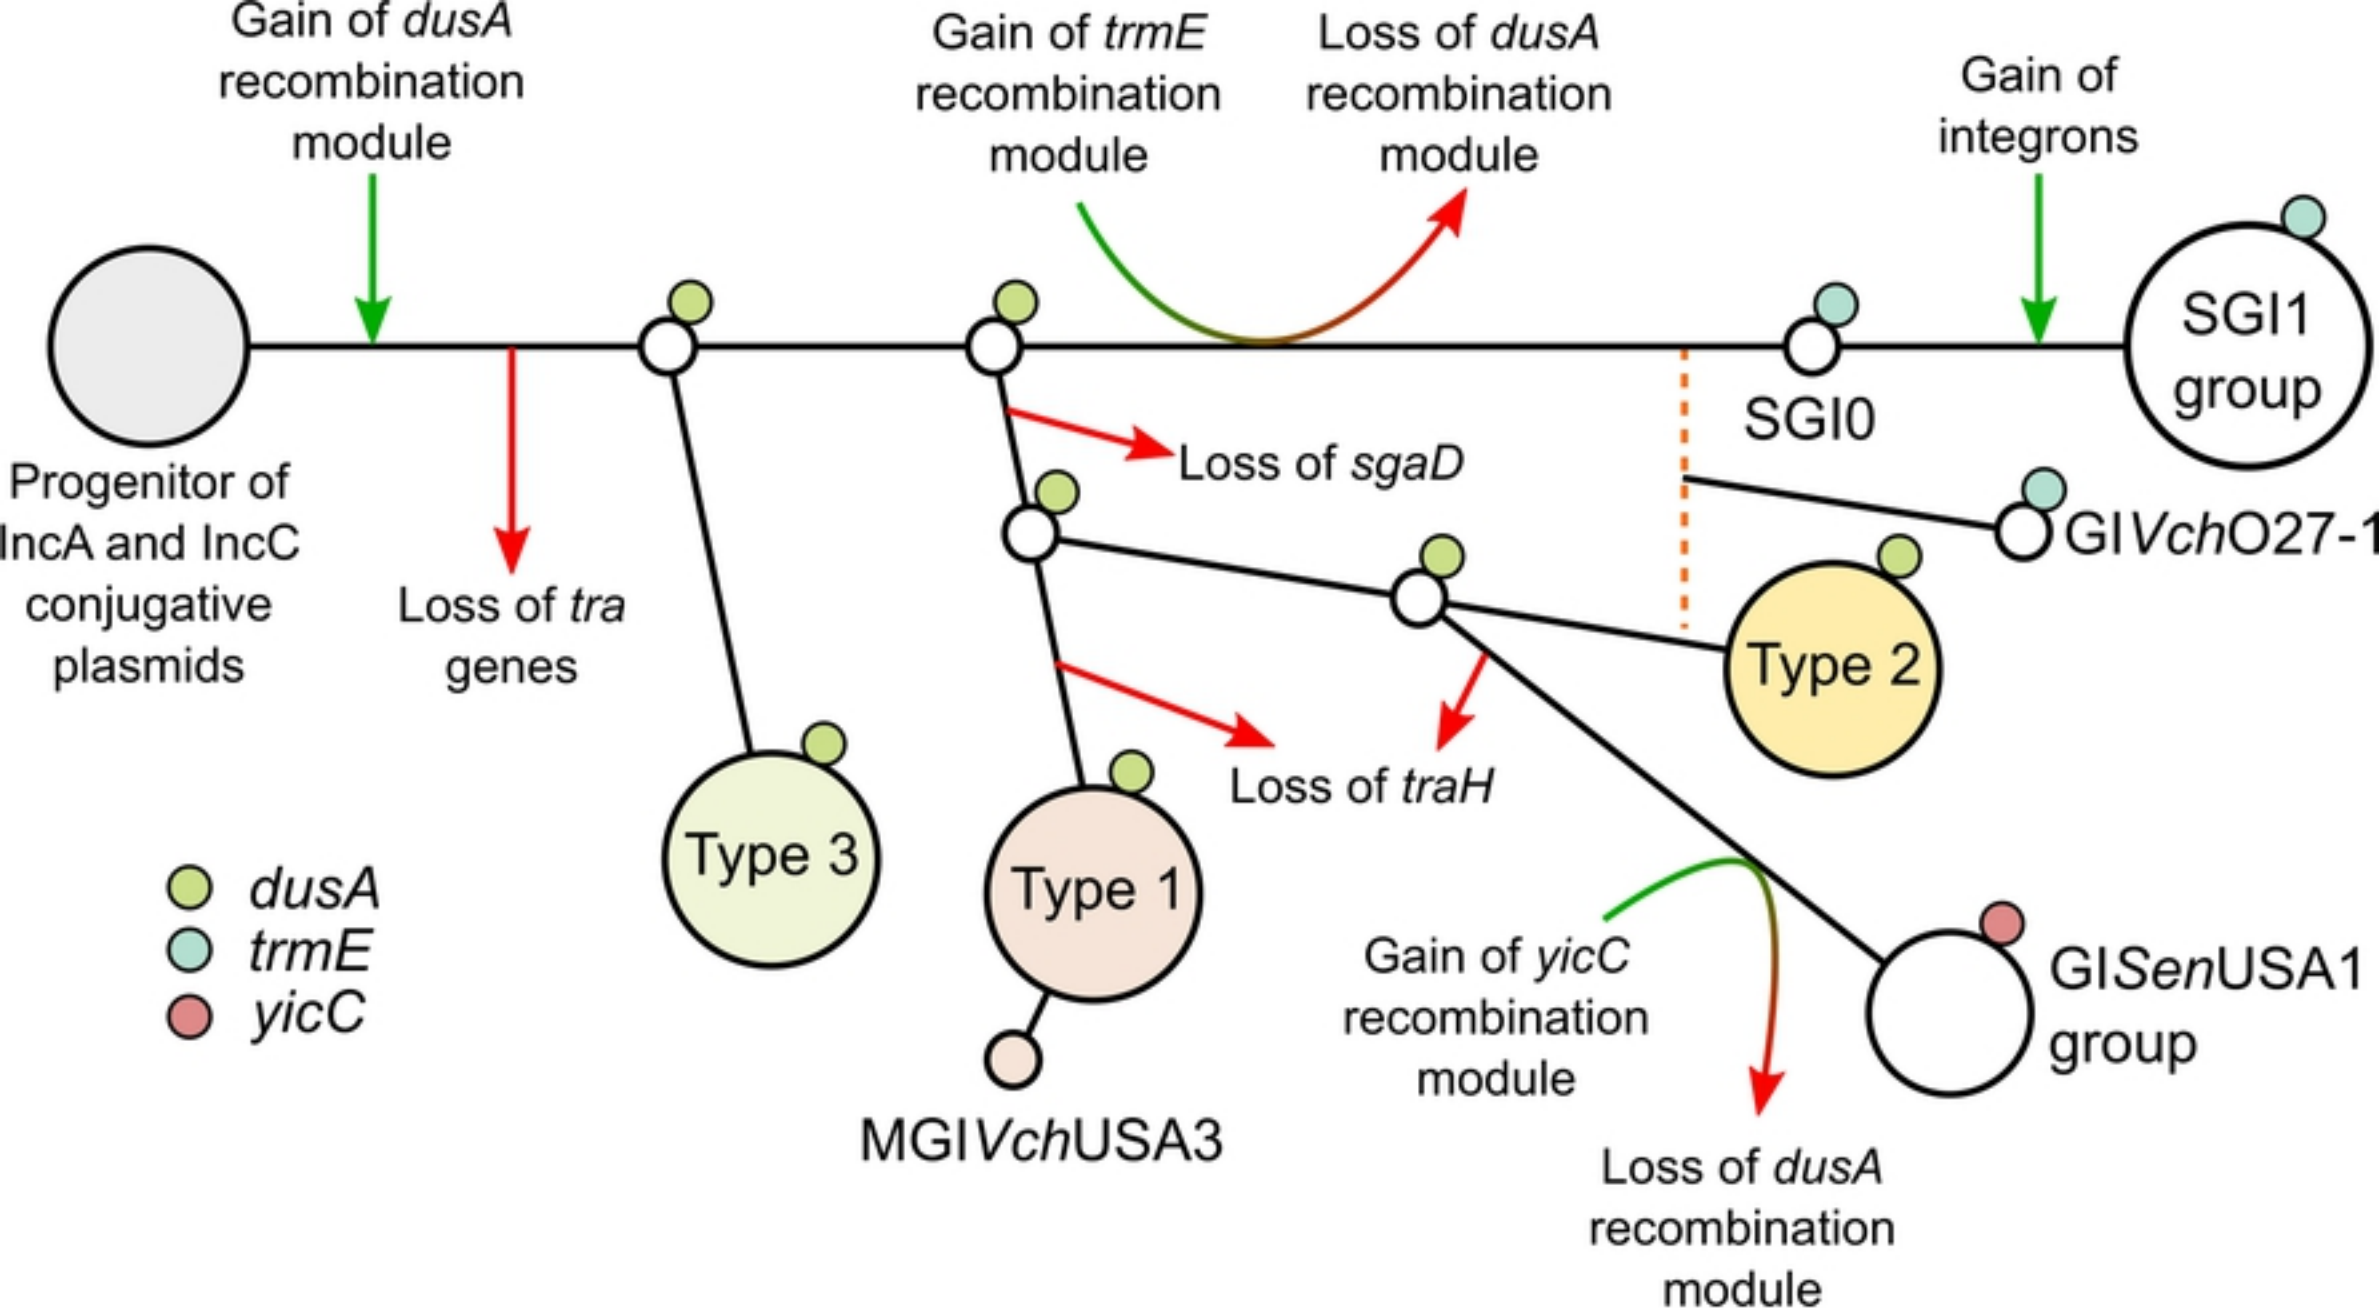

Fig 8

A

MGIV*chUSA3*<sup>Kn</sup> excision rate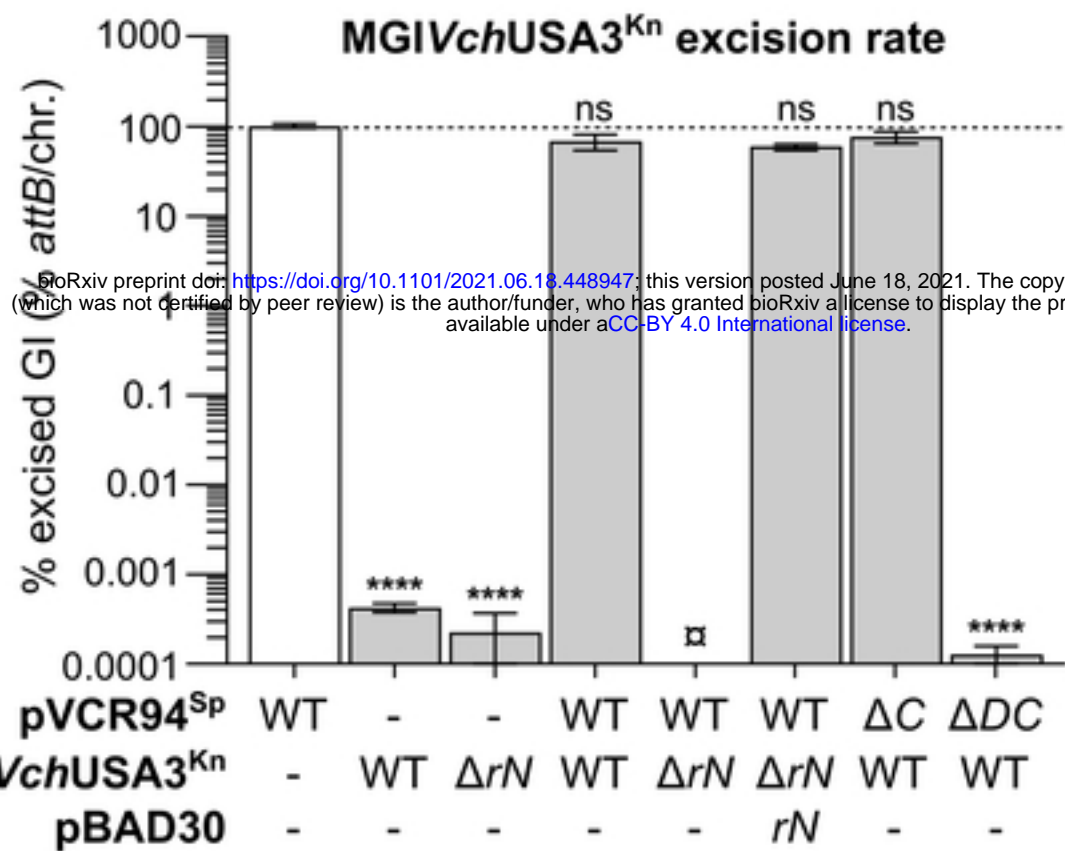

B

MGIV*chUSA3*<sup>Kn</sup> copy number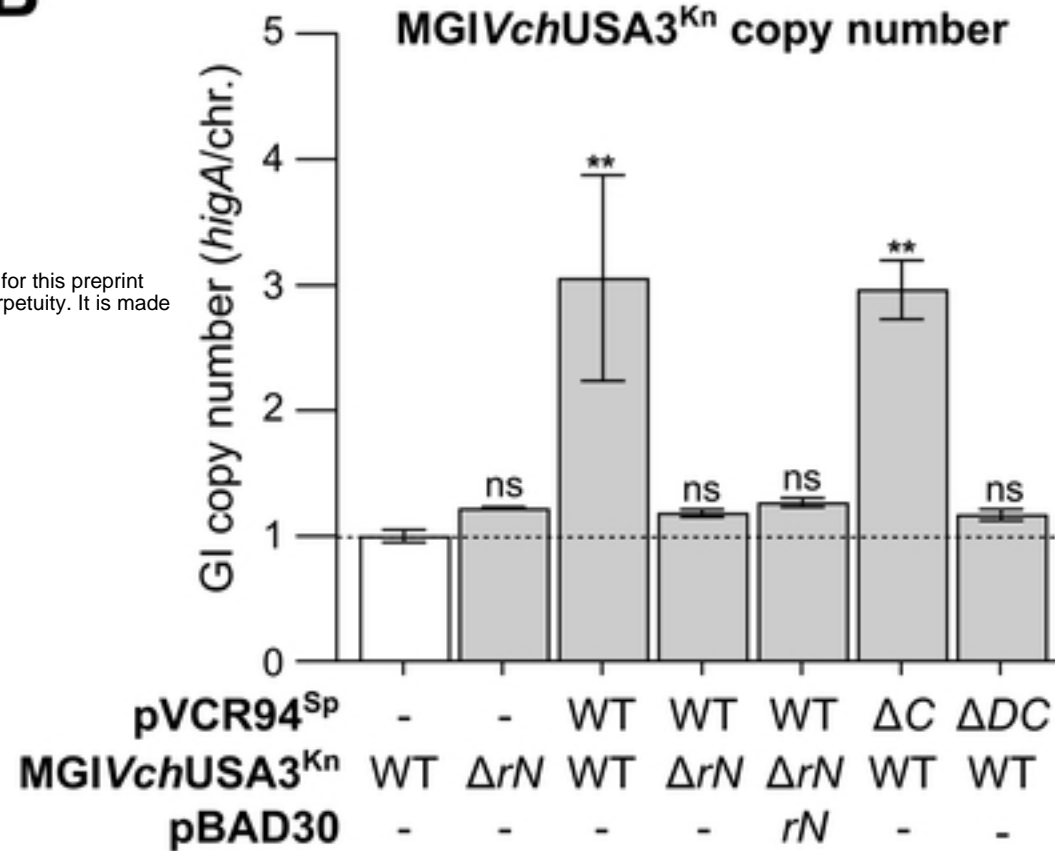

C

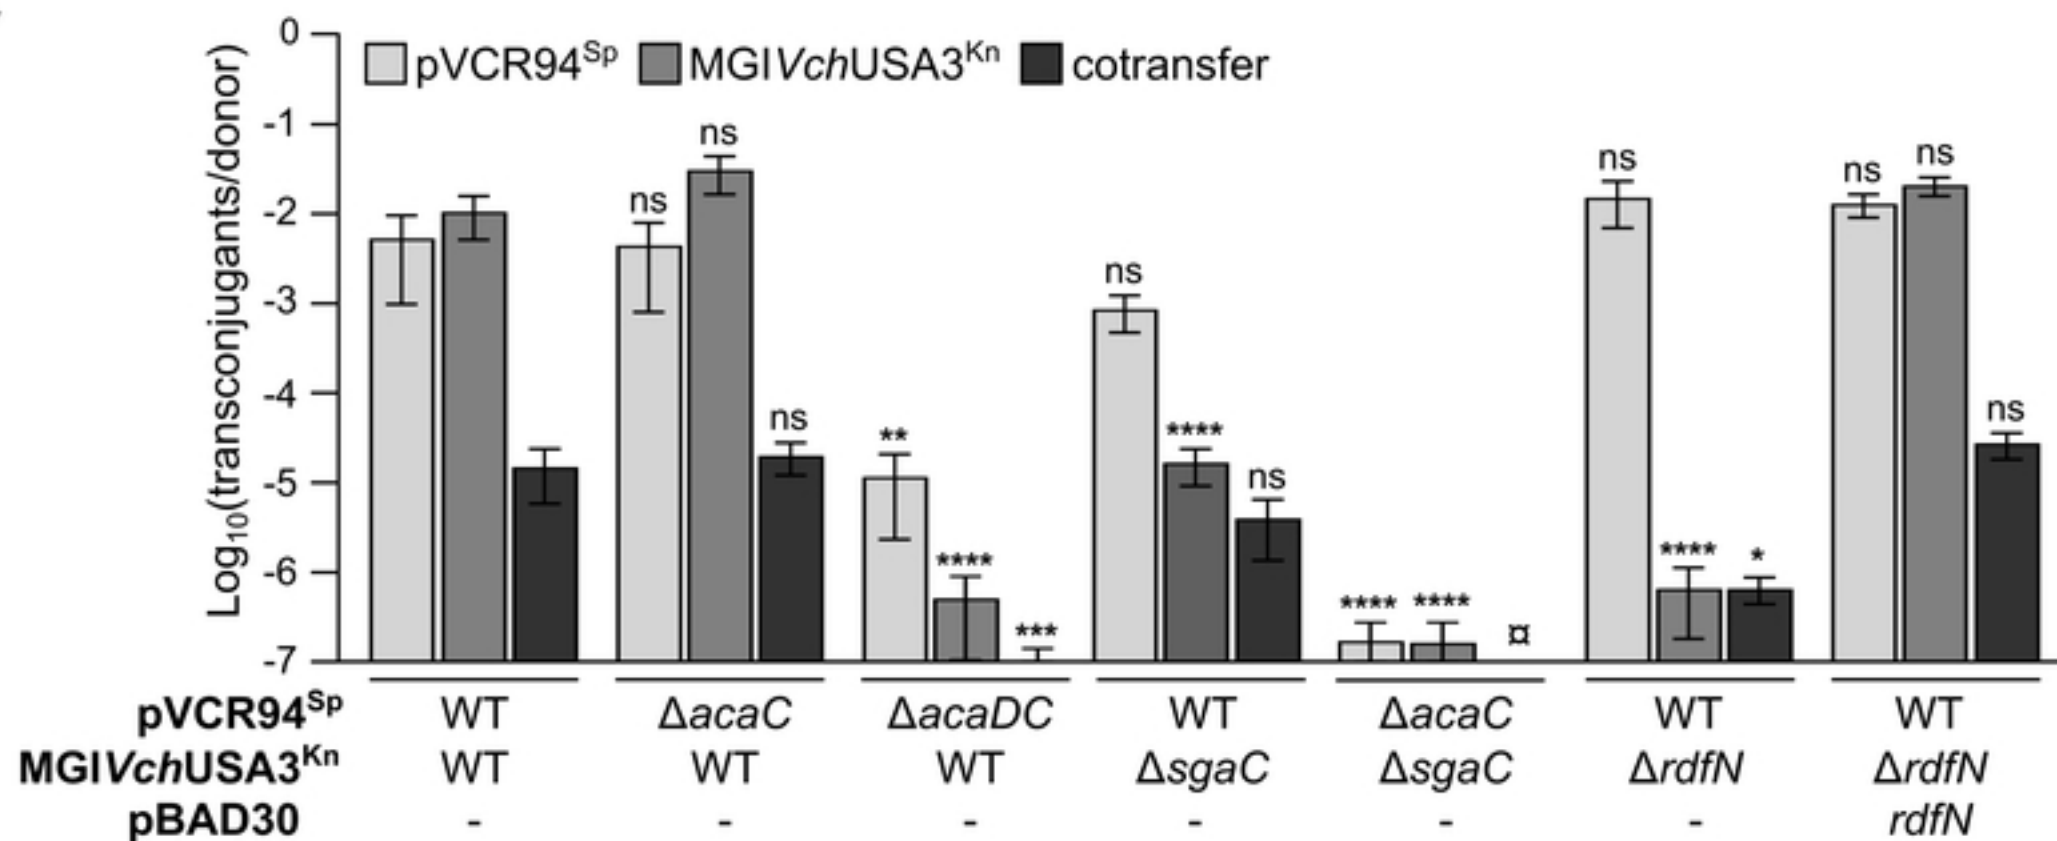

D

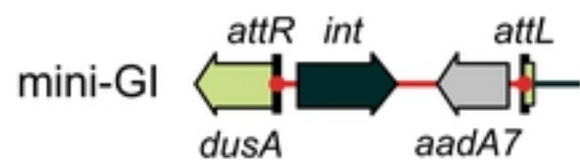

E

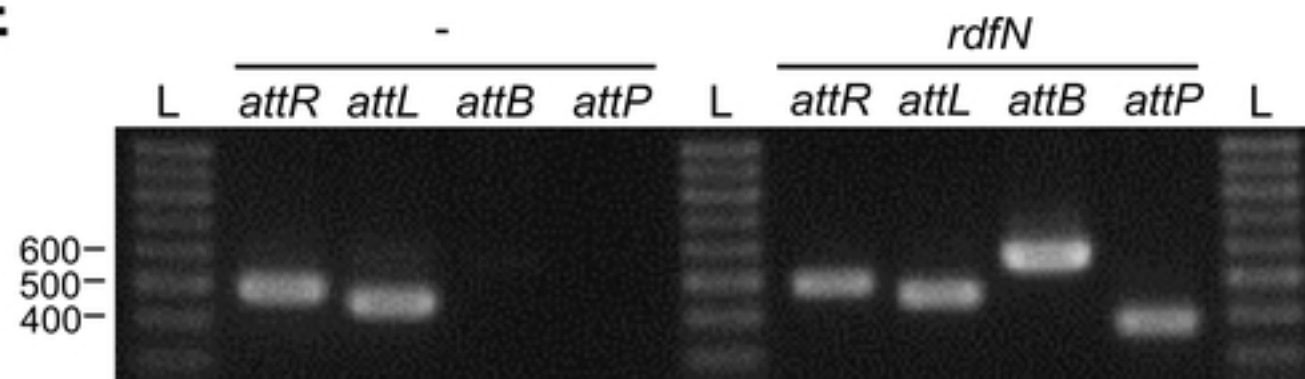

Fig 6

**A**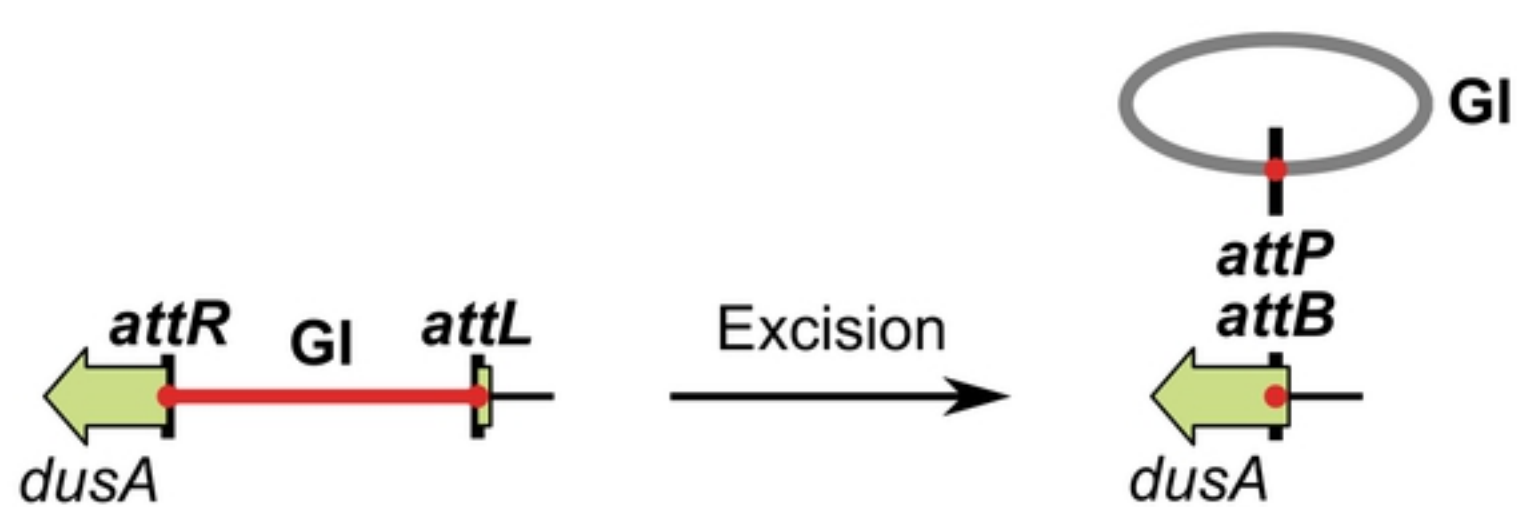**B**

*V. cholerae* OYP6G08 pVCR94<sup>Kn</sup>  $\Delta$ *acr2* (IncC<sup>+</sup>) transconjugants

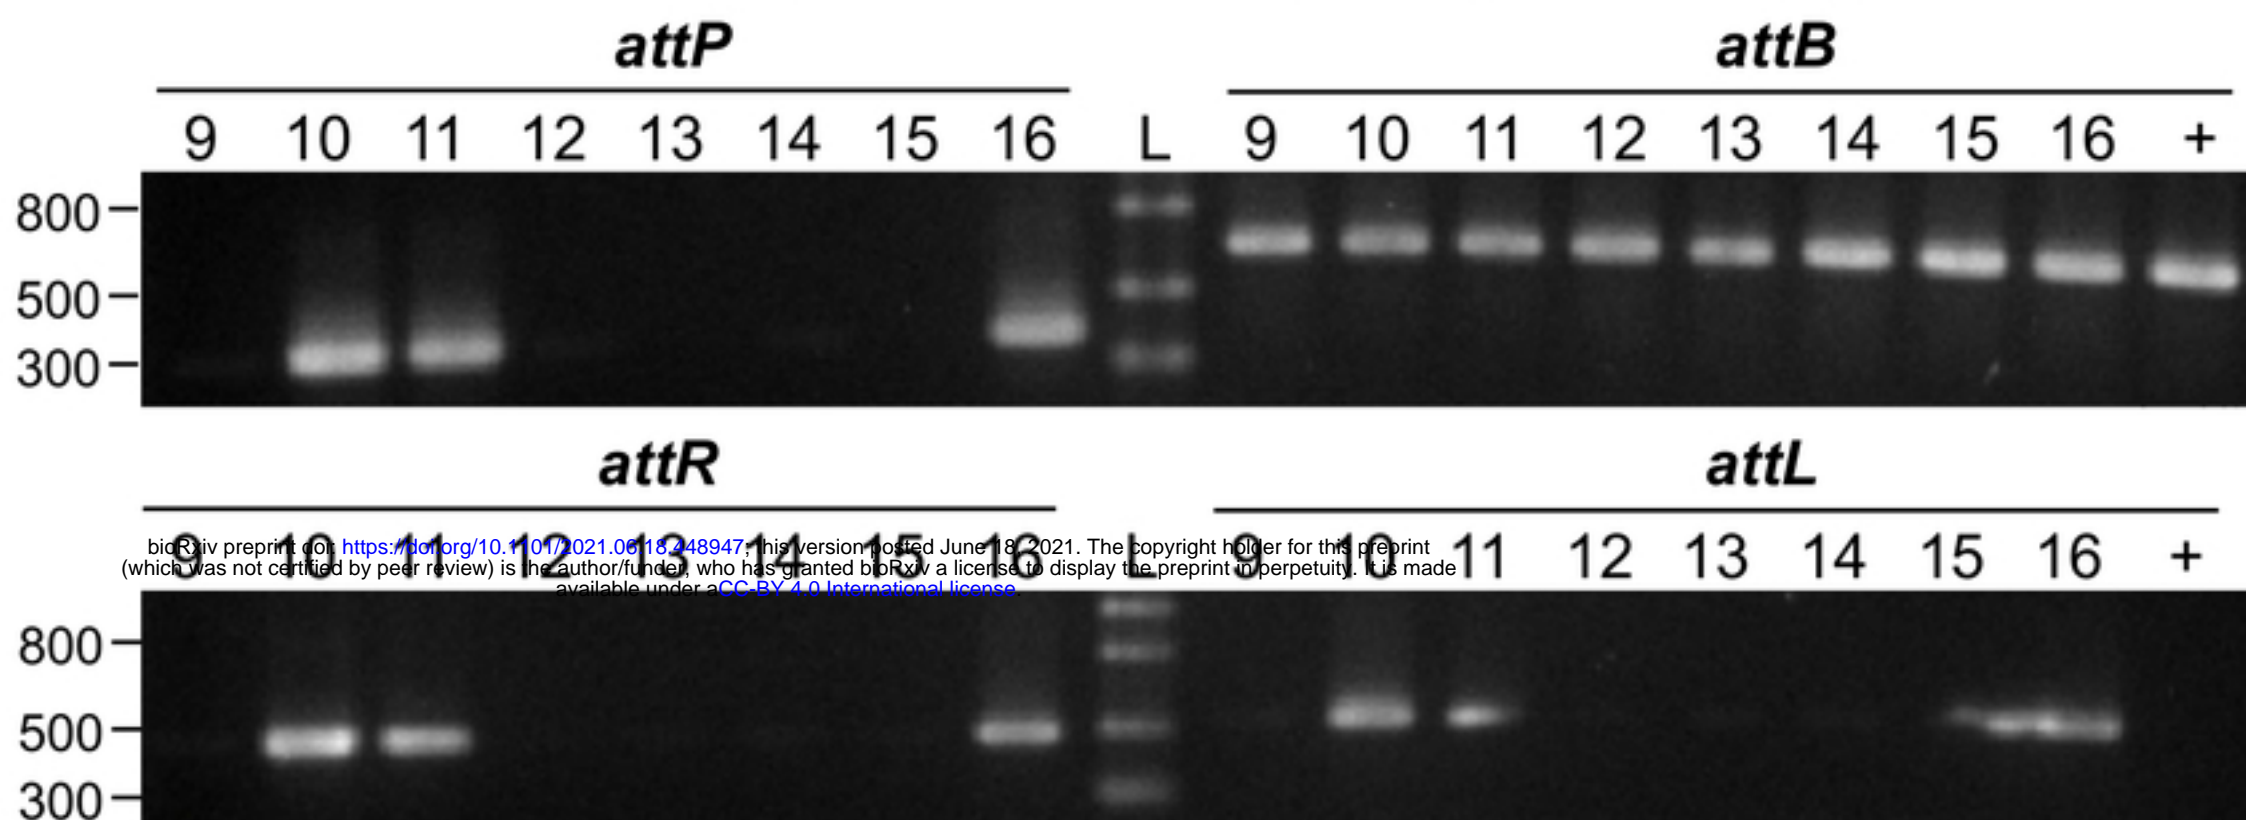**C**

*V. cholerae* OYP6G08 (IncC<sup>-</sup>)

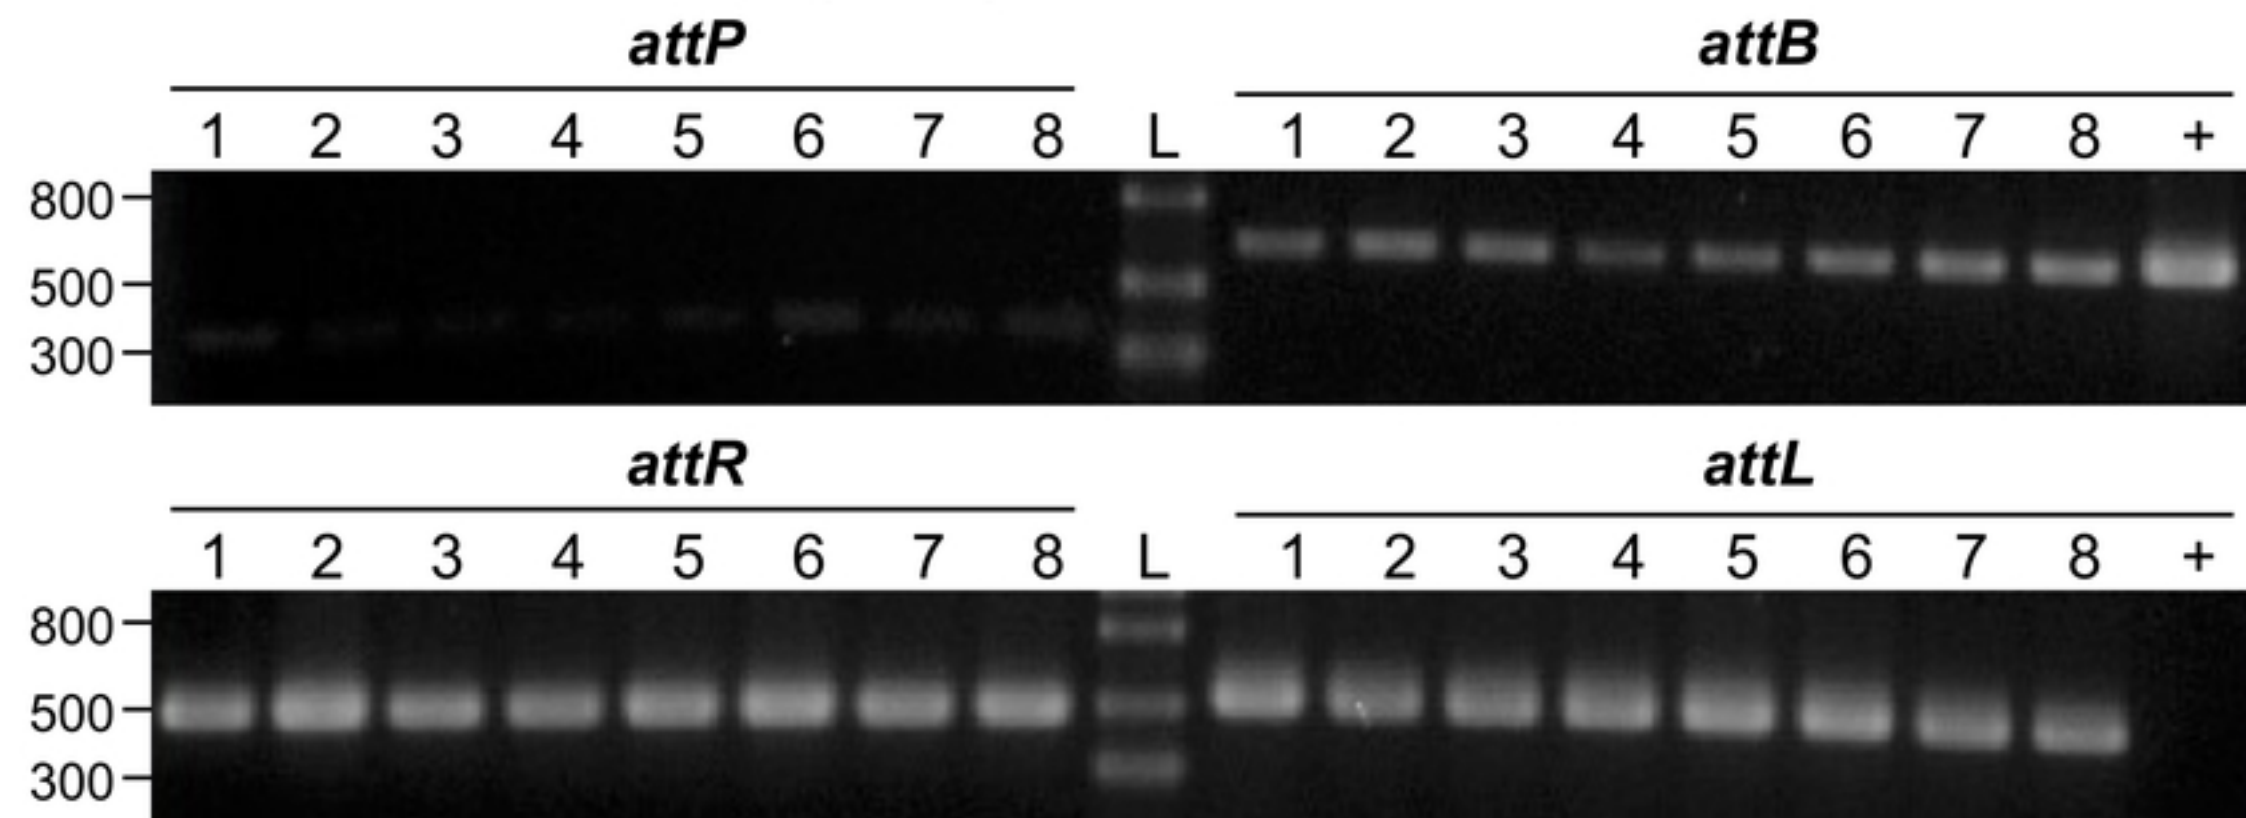**D**

*E. coli* CAG19439 transconjugants

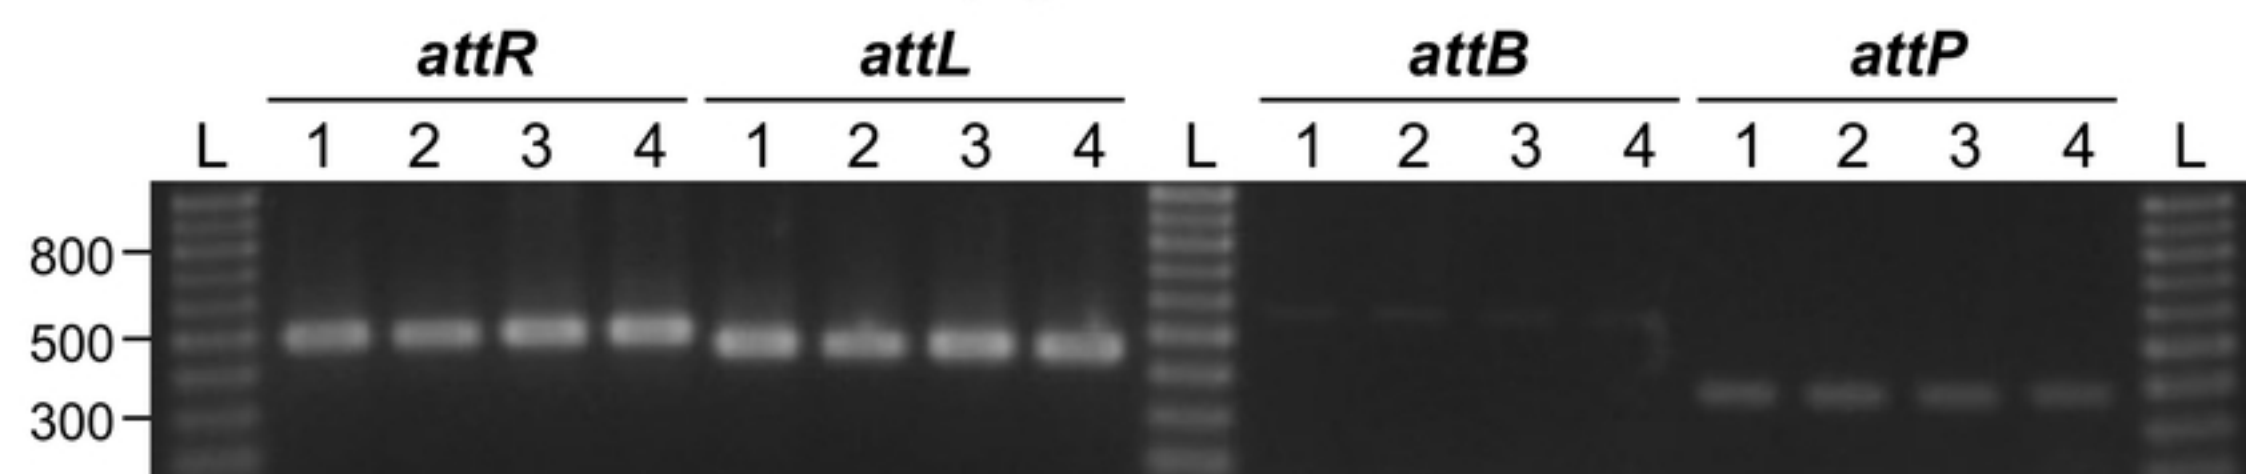

Fig 5
